# Supplementary material
Source: ML conference proceedings conference paper supplement (https://aclanthology.org/2025.bionlp-1.8)

**(A) Species Count by Section (top 10)**

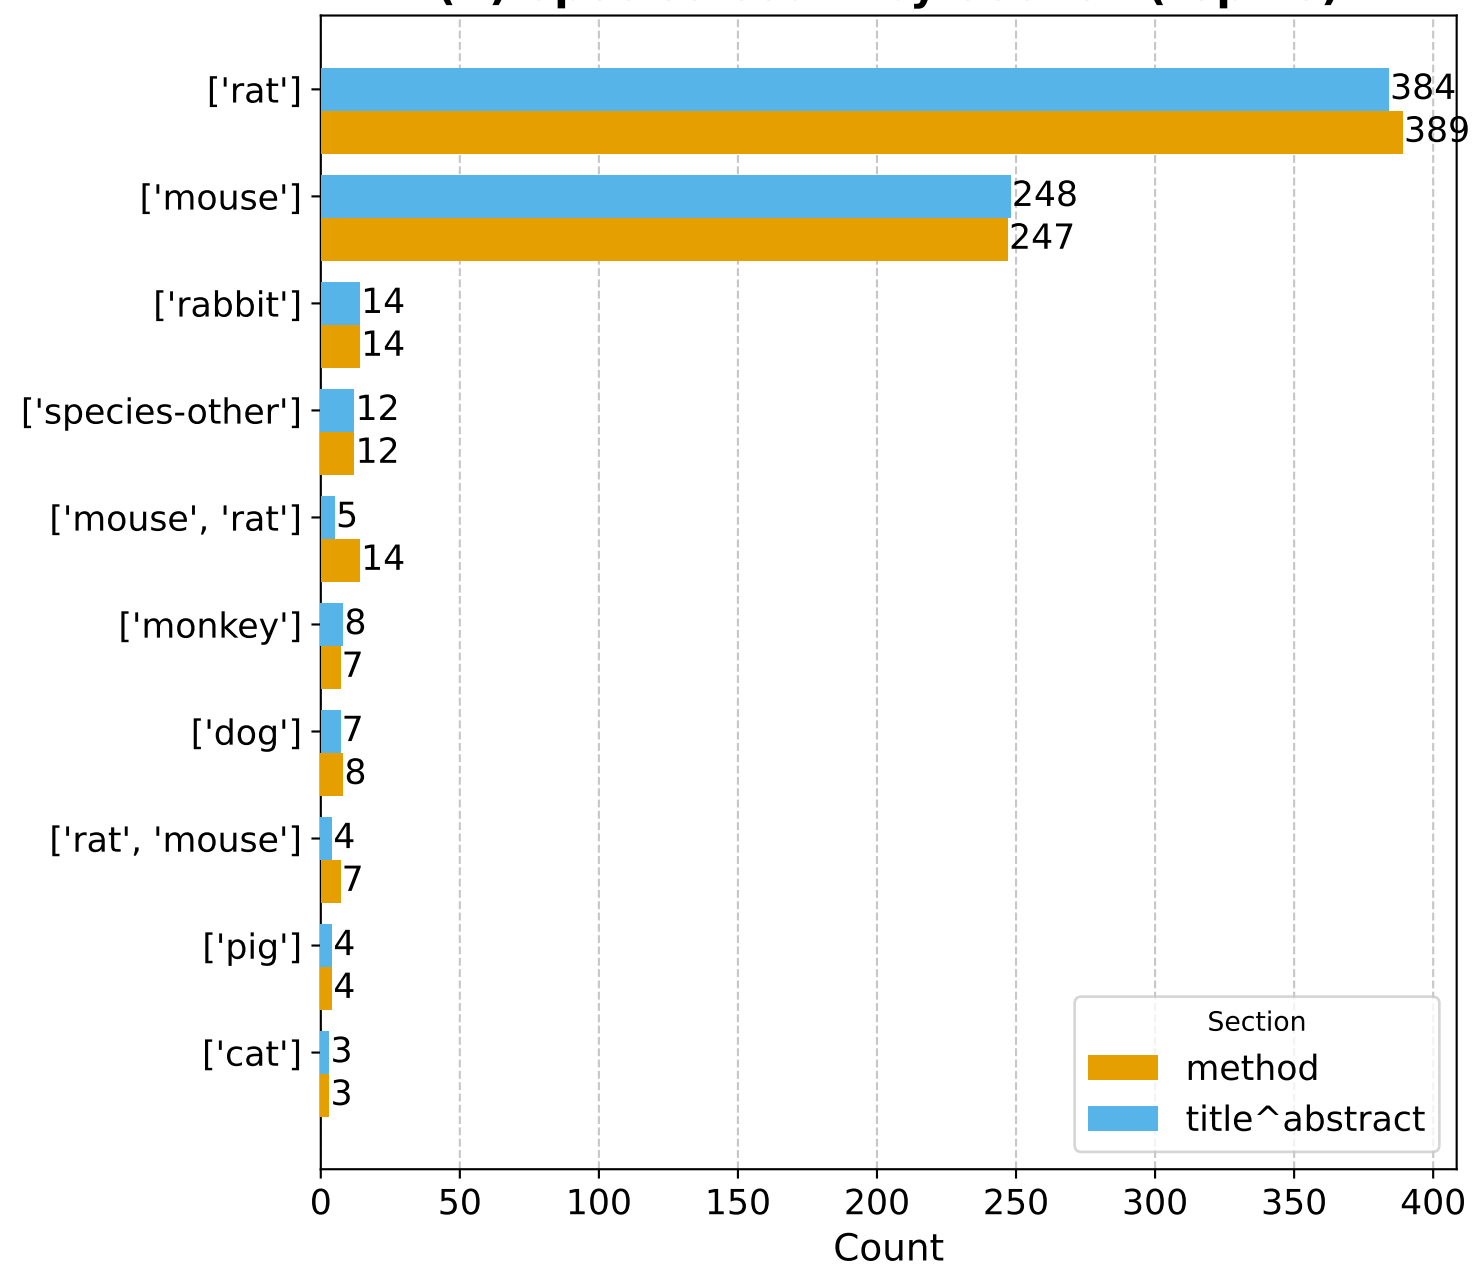

**(B) Outcome Count by Section (top 10)**

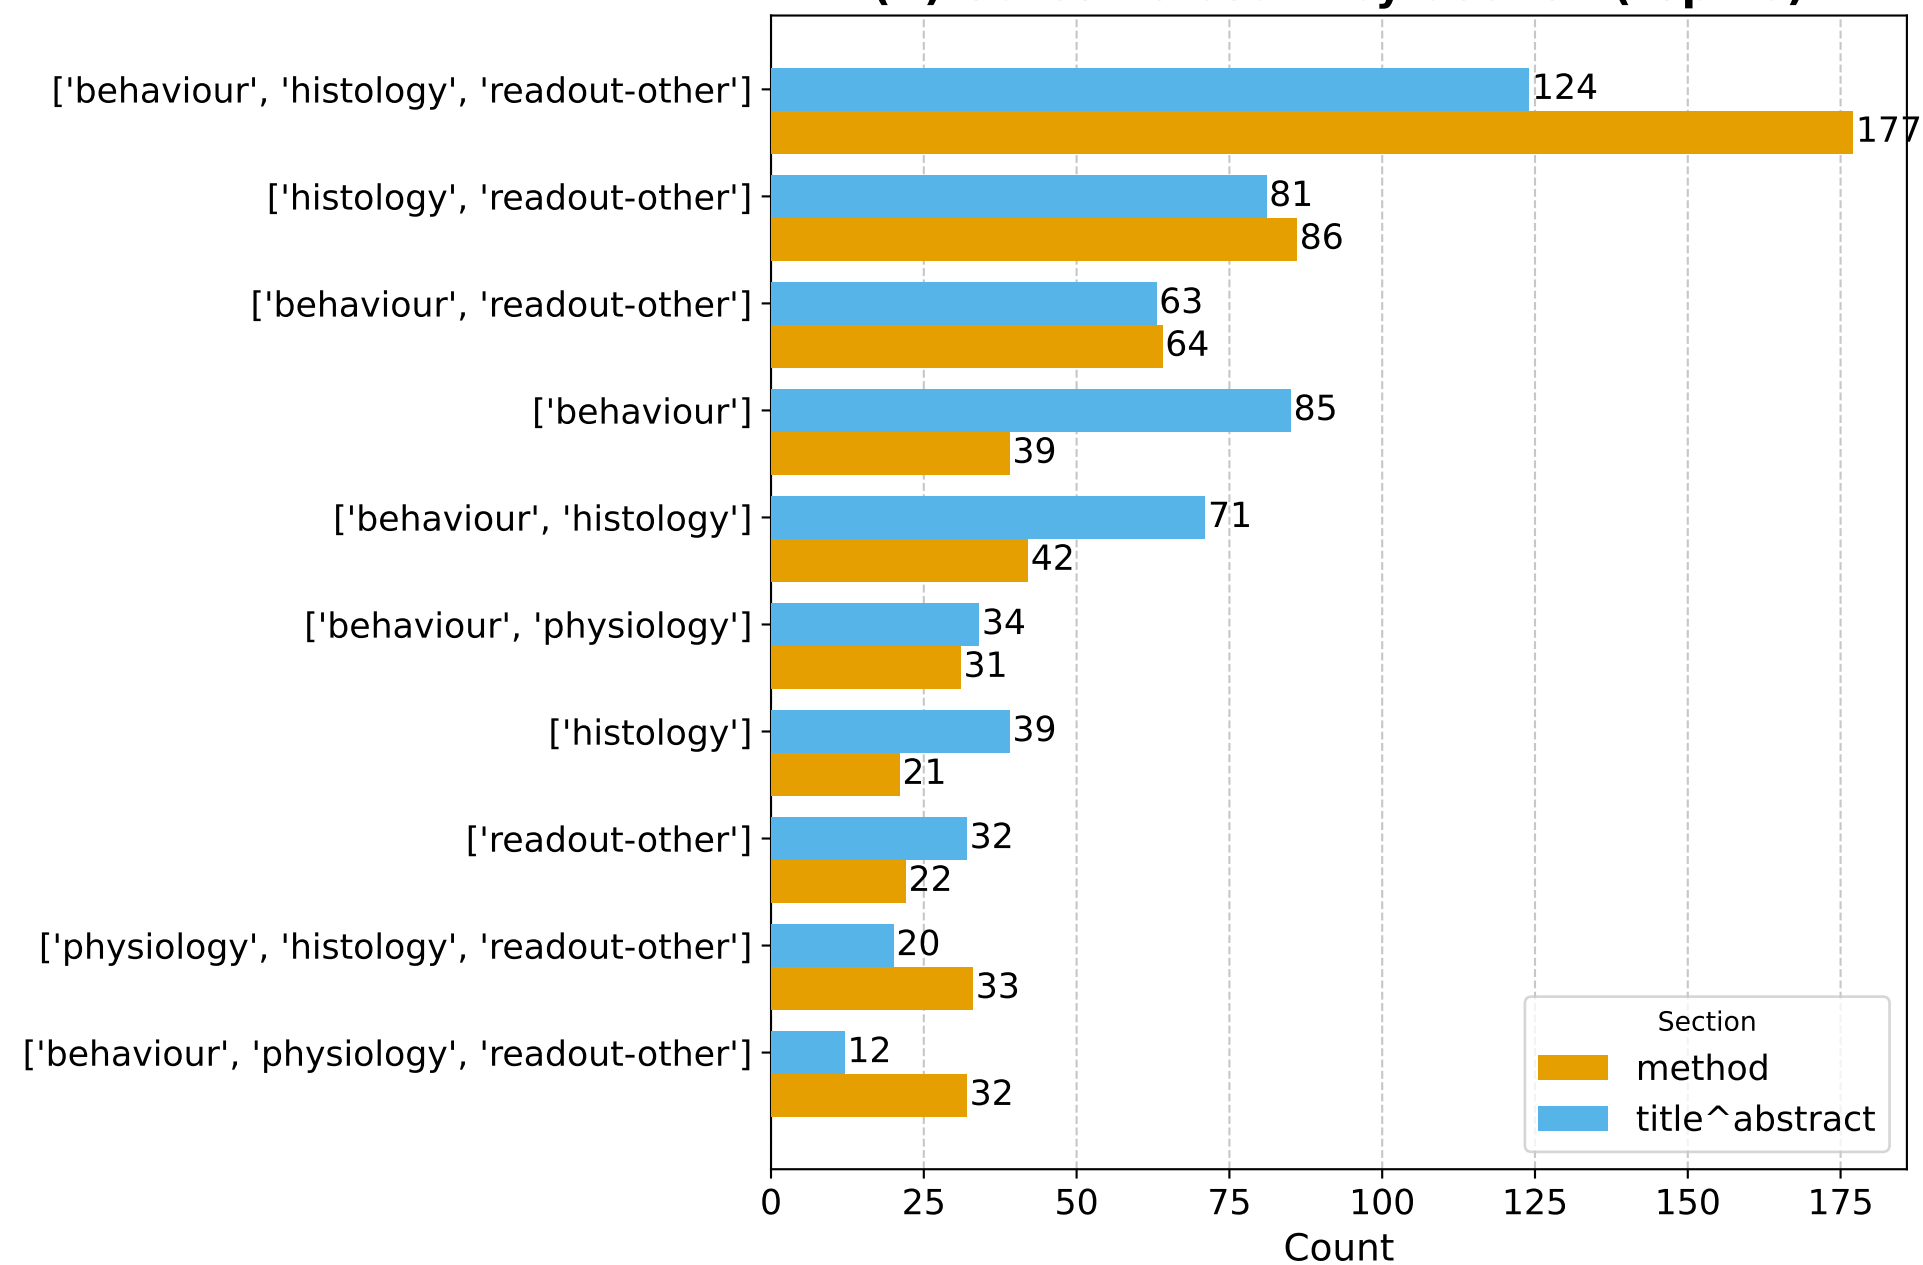

**(C) Control Count by Section (top 10)**

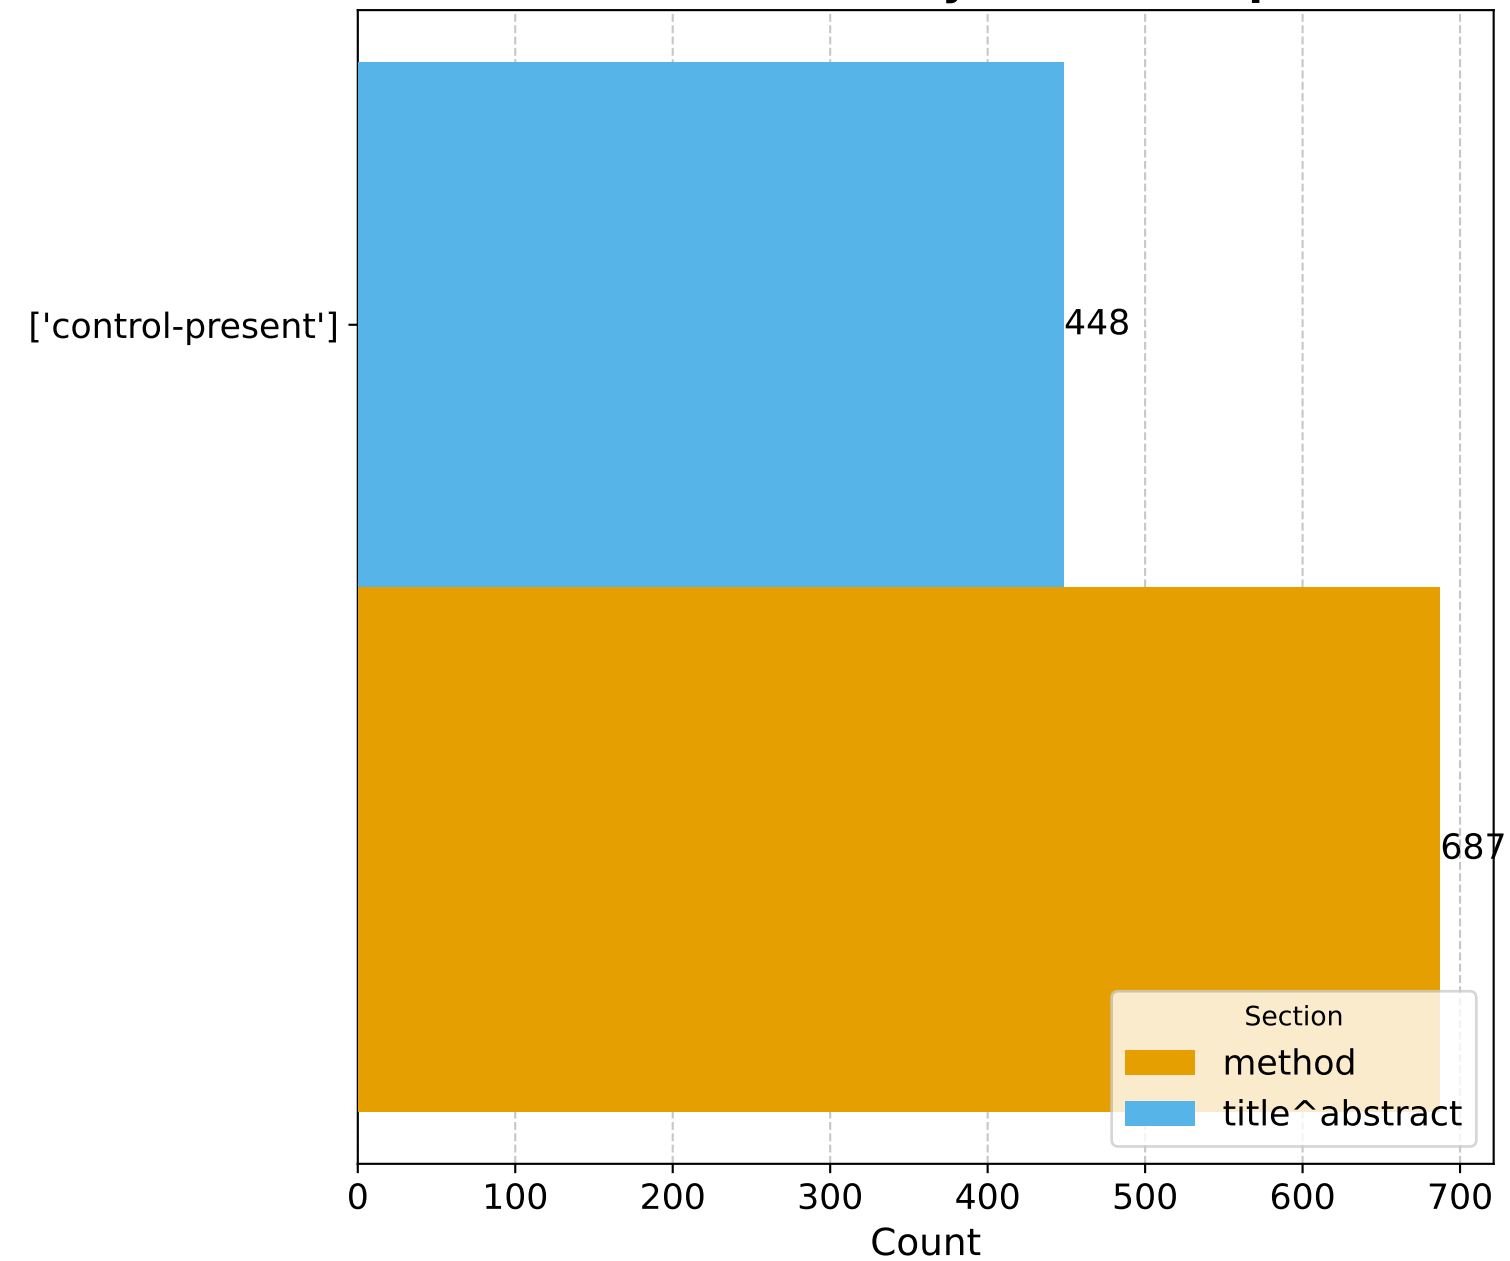

**(D) Sex Count by Section (top 10)**

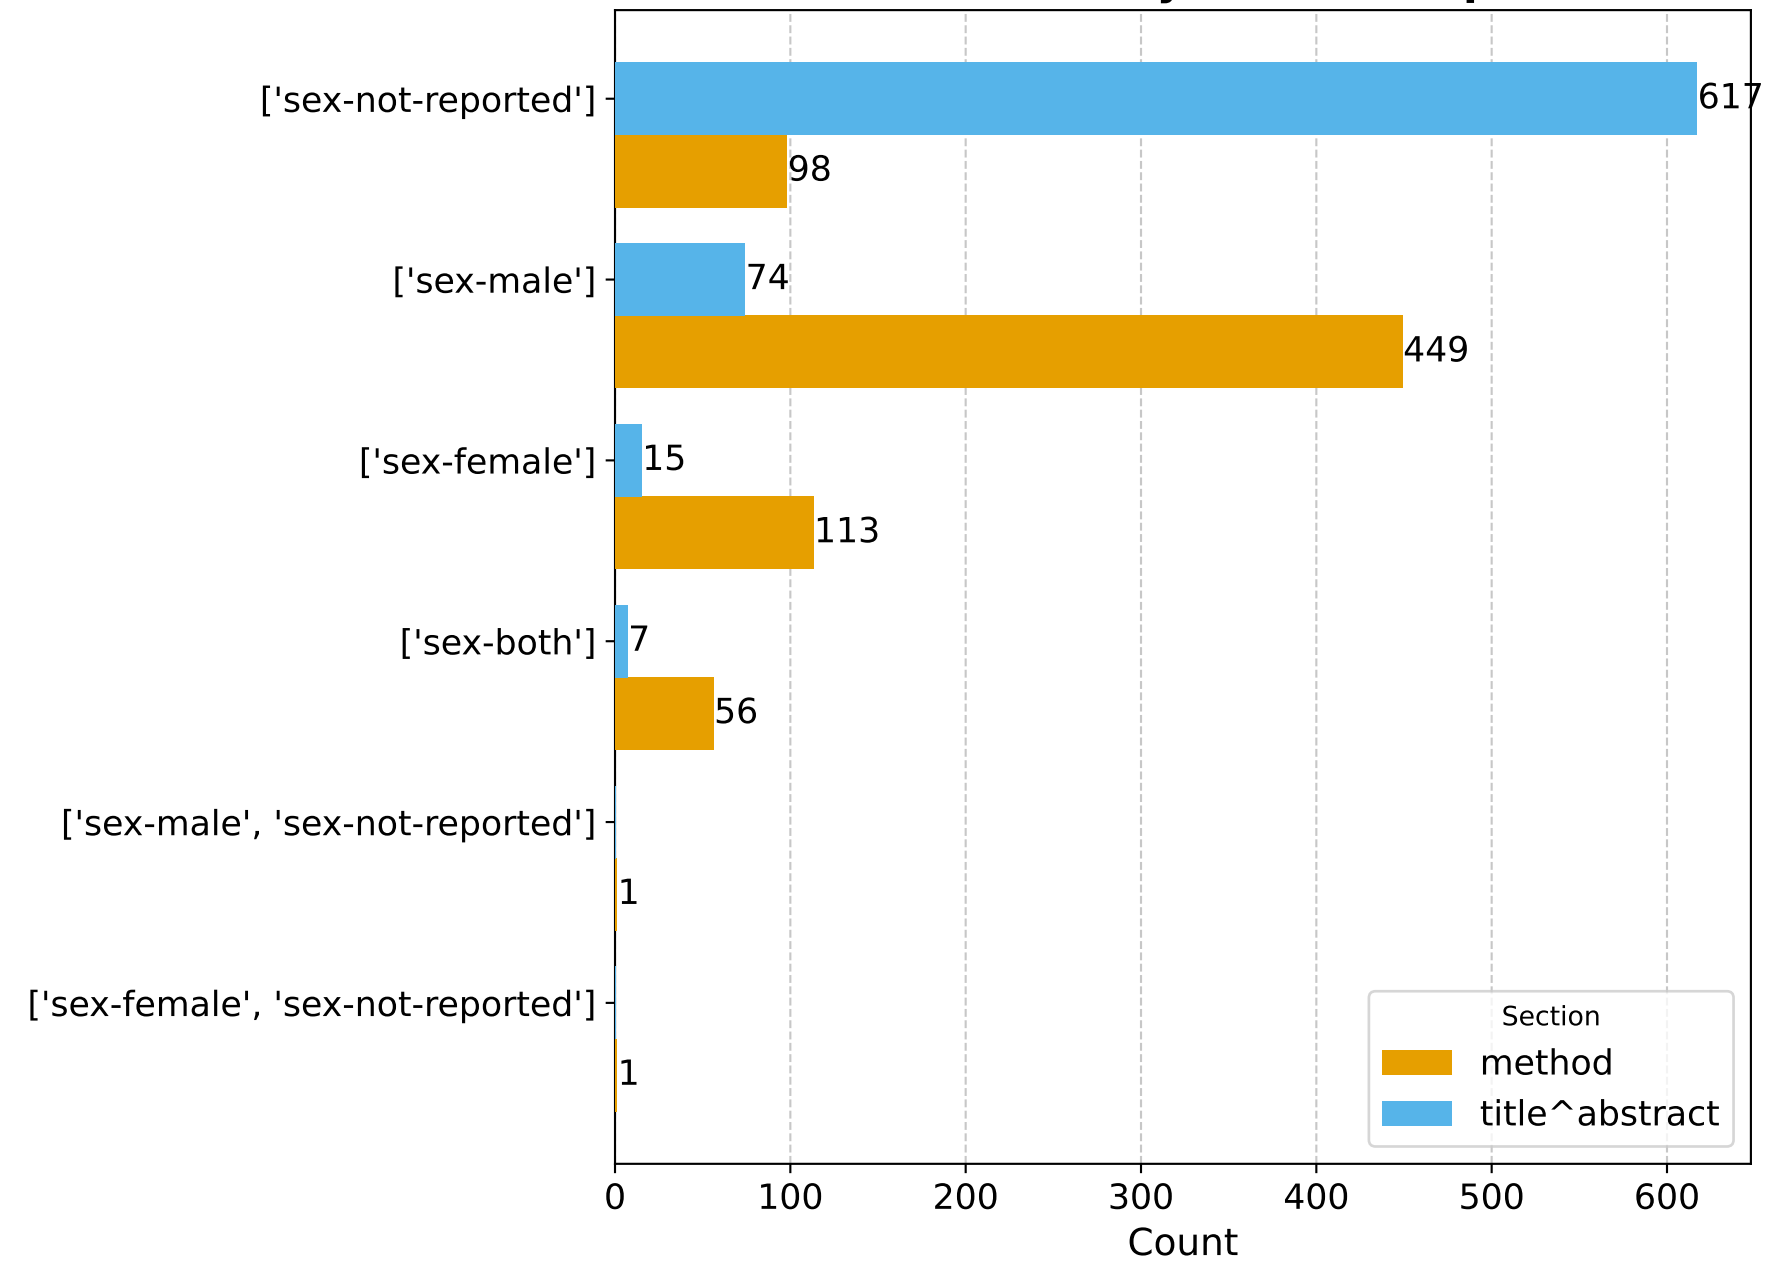

Supplement: SupplementaryMaterial [file abstract_classification_combined.pdf › images/abstract_classification_combined.pdf]
