# Supplementary material
Source: ML conference proceedings conference paper supplement (https://aclanthology.org/2025.bionlp-1.8)

**Top 15 Entities in Therapy Drug**

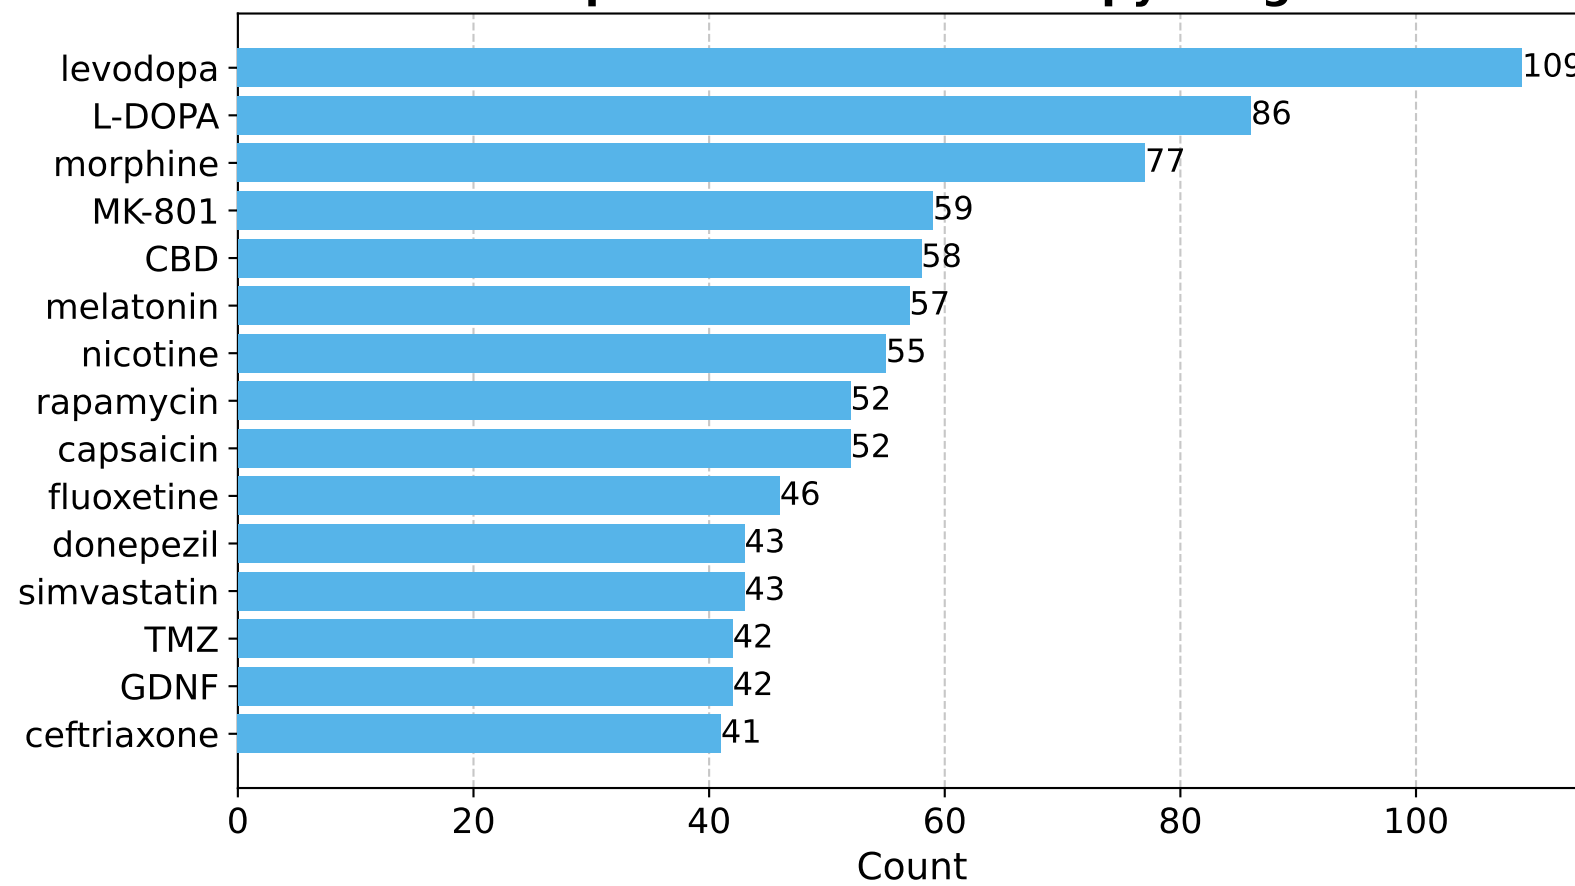

**Top 15 Entities in Therapy Other**

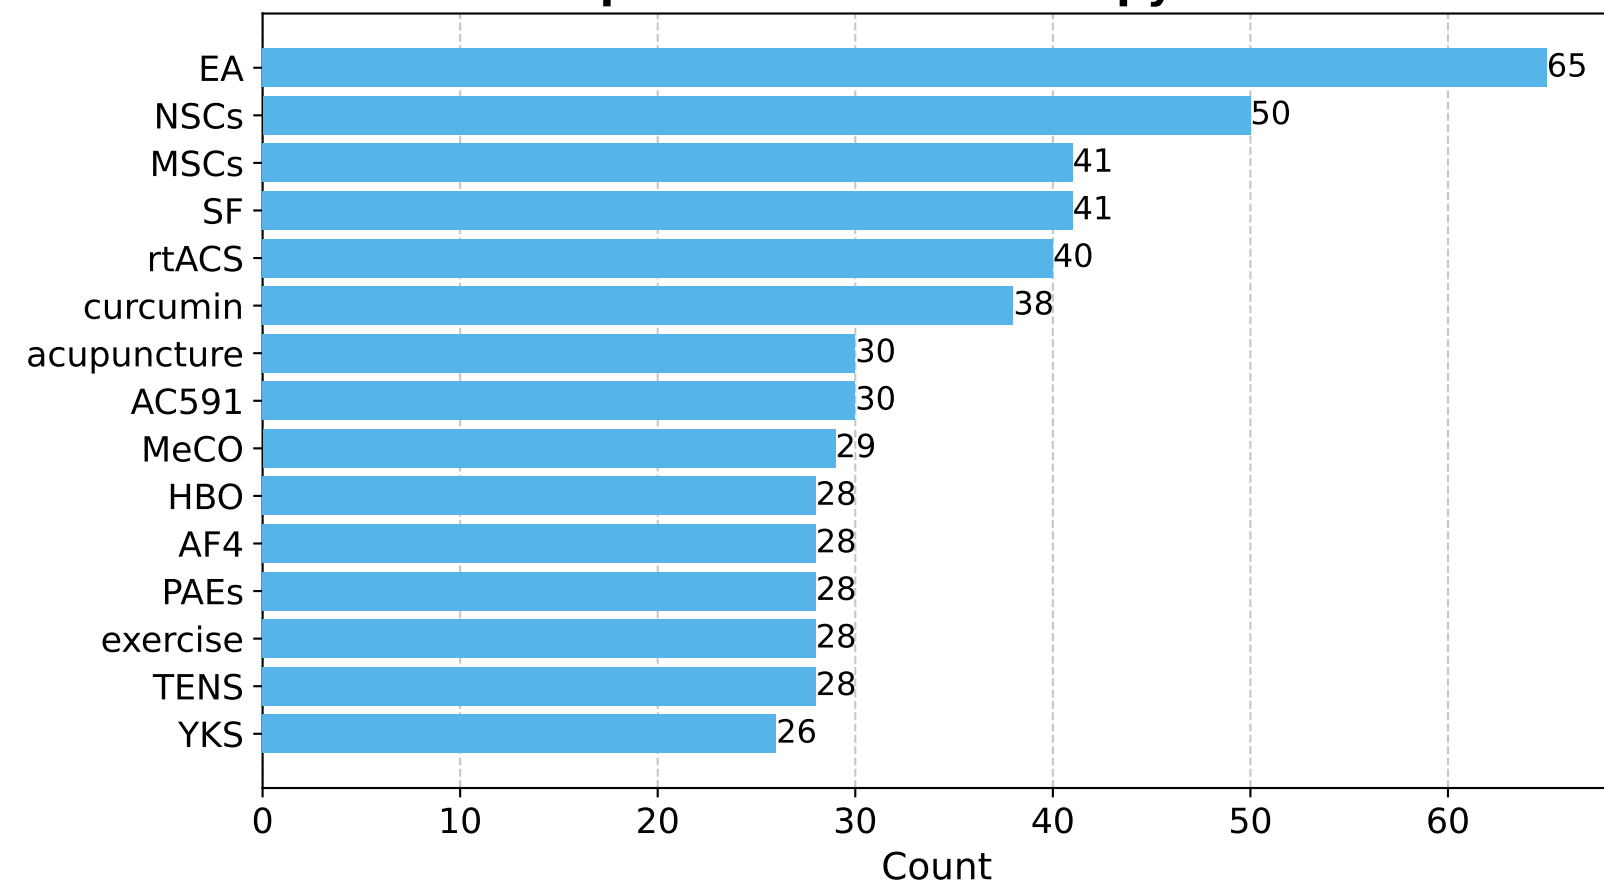

**Top 15 Entities in Disease**

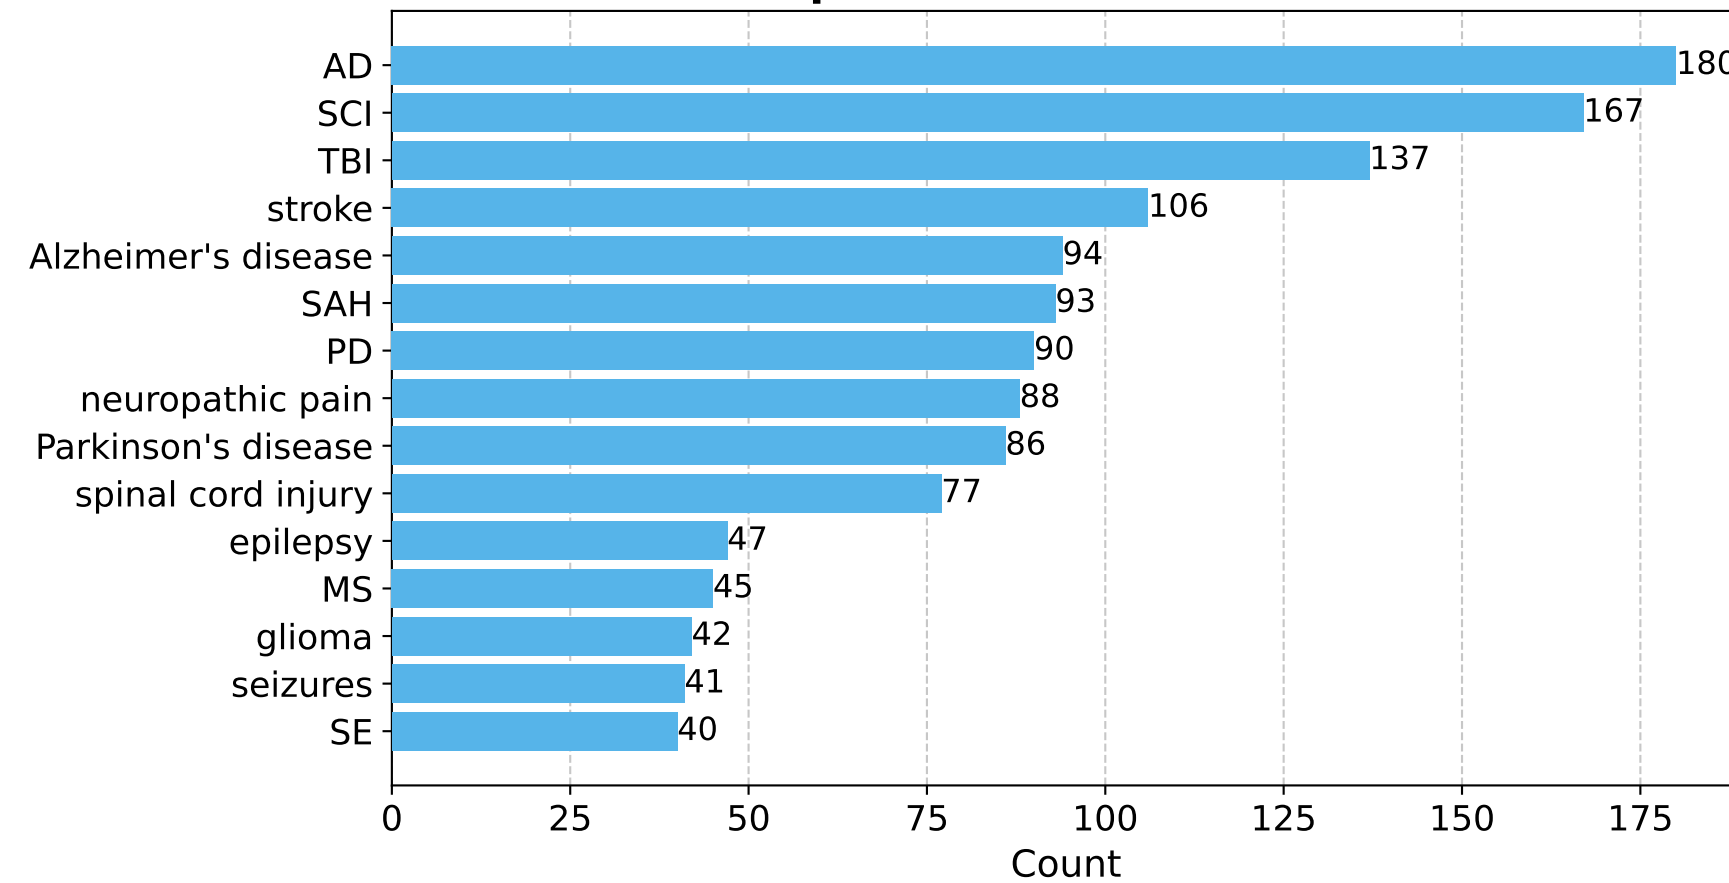

**Top 15 Entities in Strain**

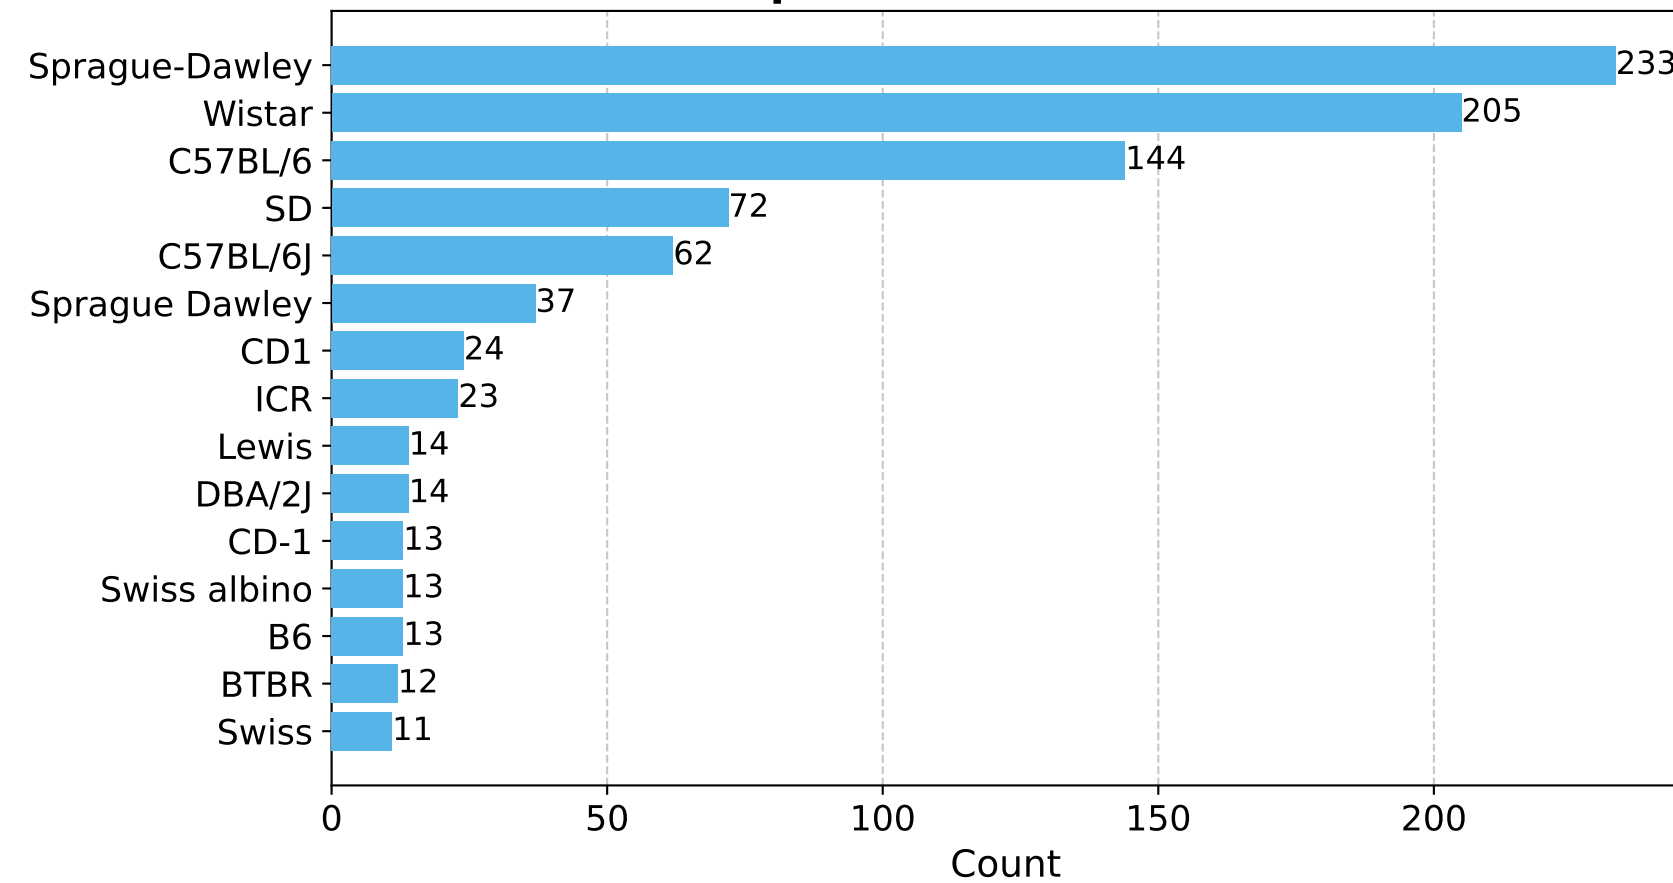

**Top 15 Entities in Animals Number**

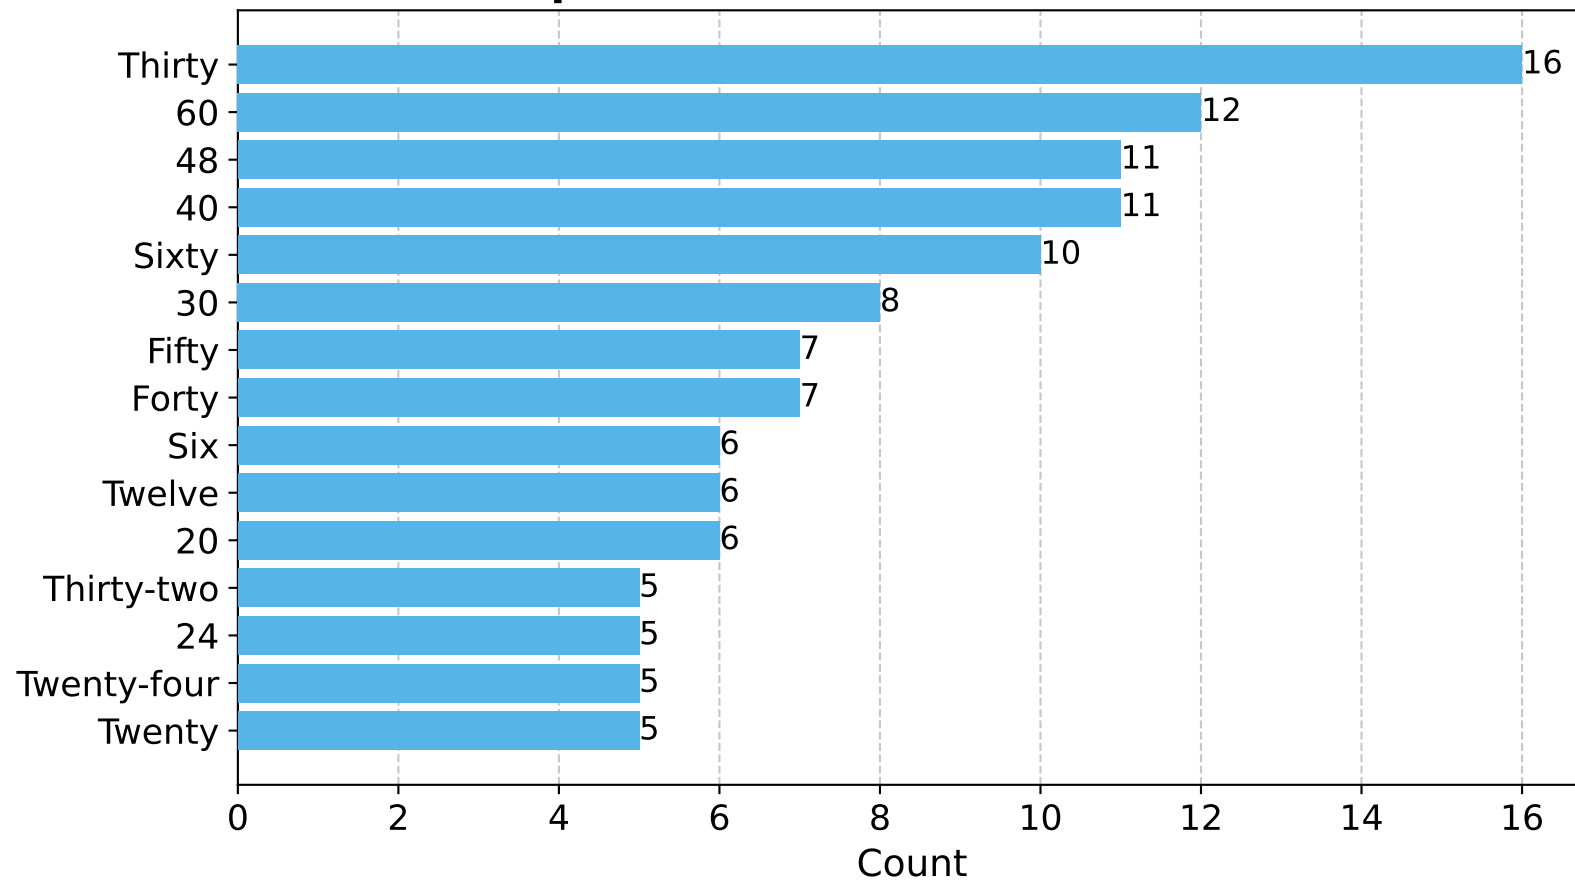

Supplement: SupplementaryMaterial [file ner_entities_texts_combined.pdf › images/ner_entities_texts_combined.pdf]
