# Supplementary material
Source: ML conference proceedings conference paper supplement (https://aclanthology.org/2025.bionlp-1.8)

Cohen's Kappa - Therapy Drug

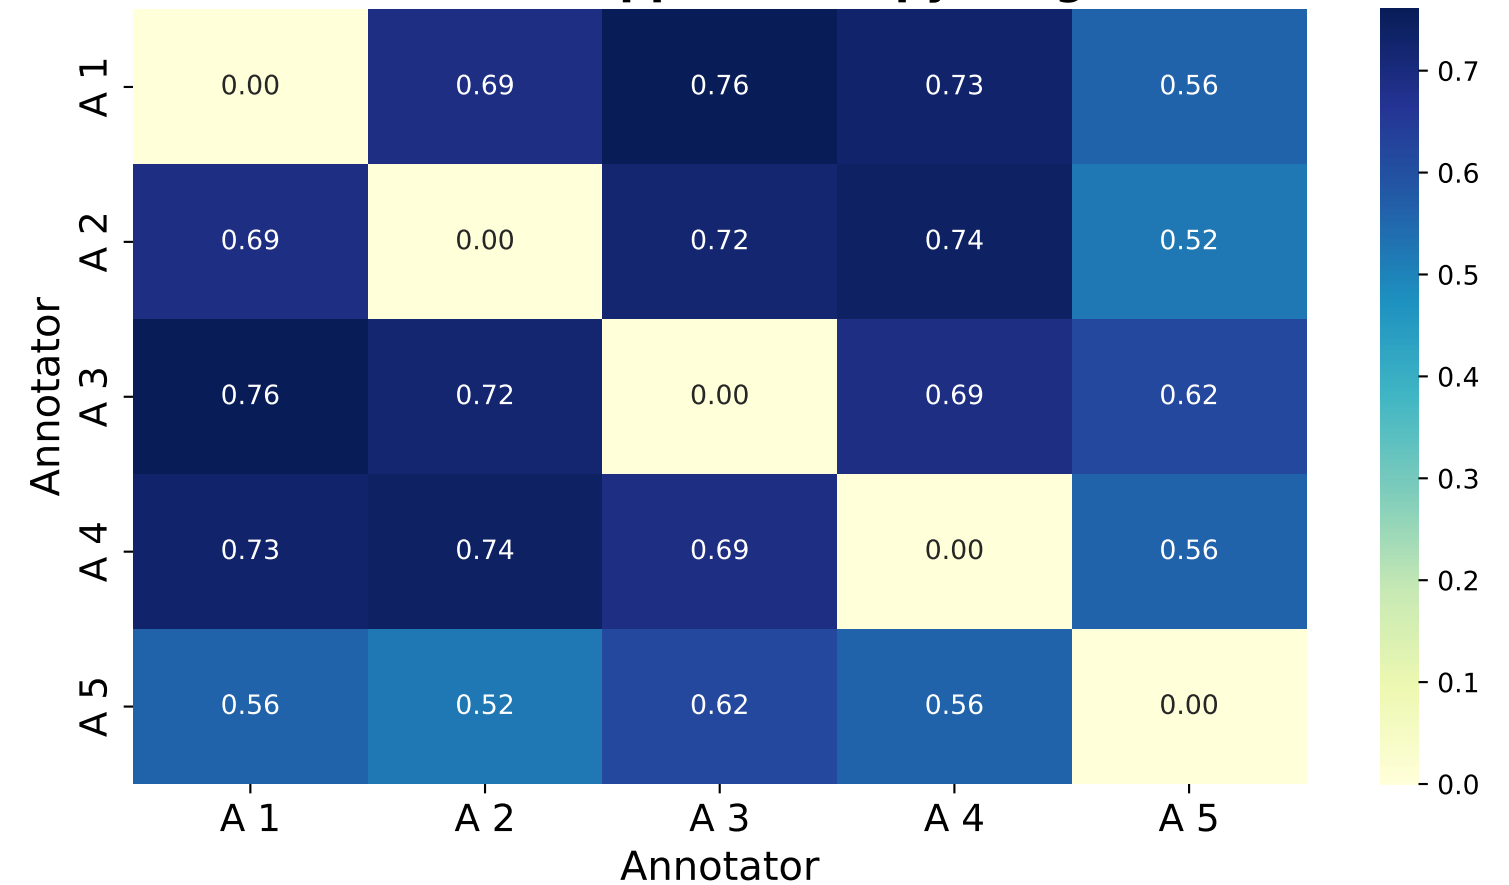

Top 15 Entities - Therapy Drug

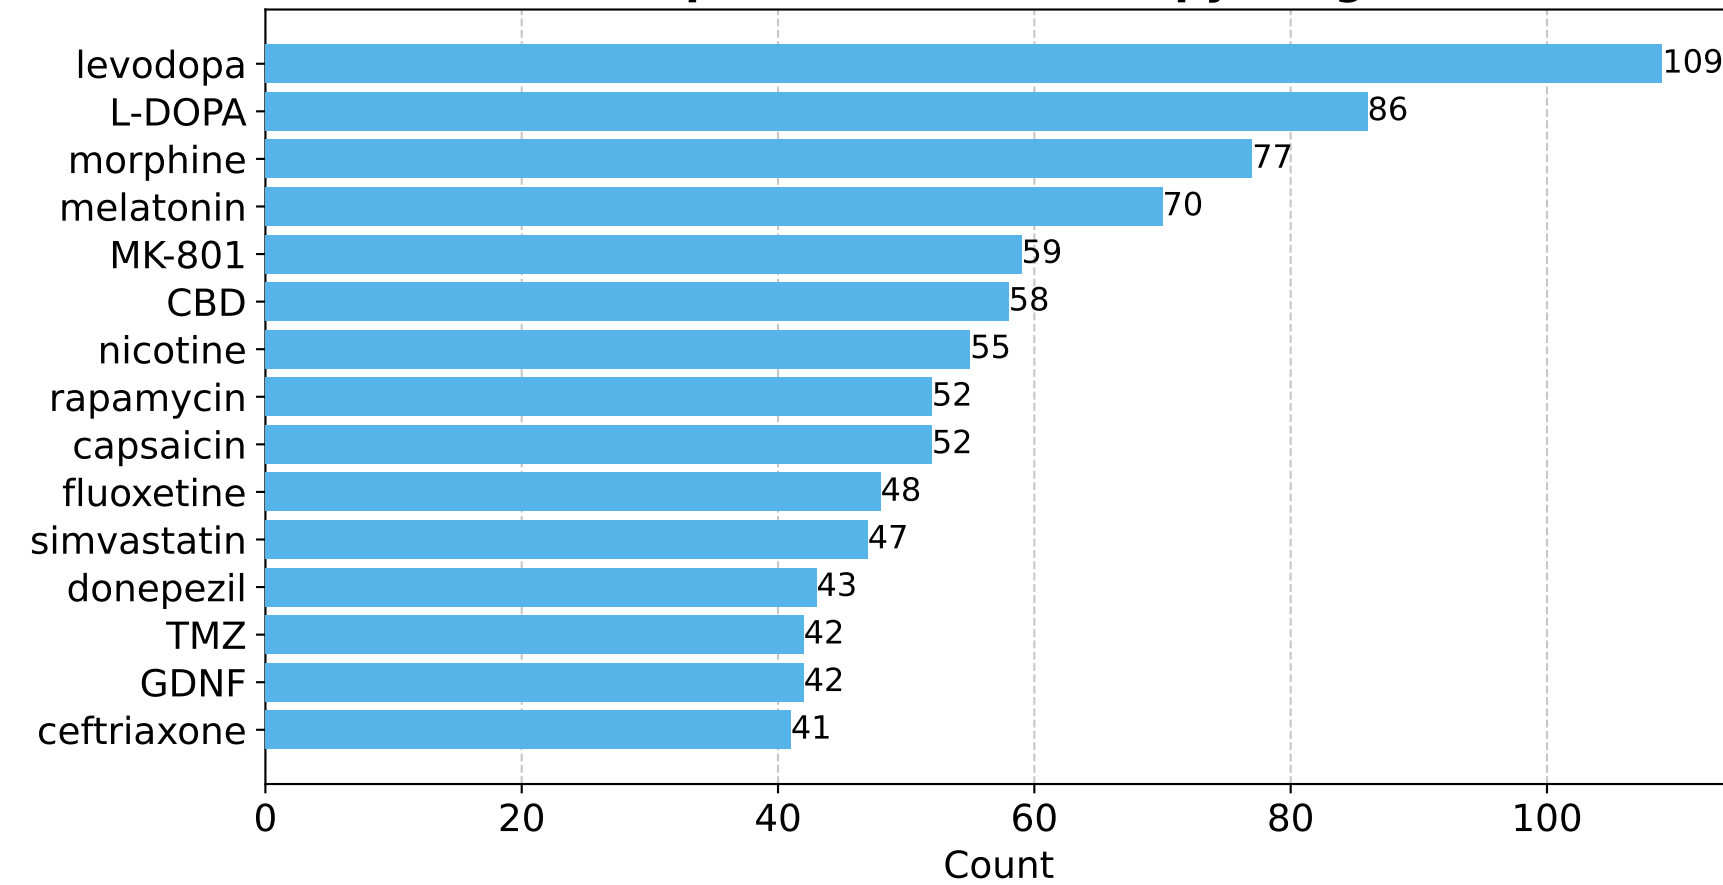

Cohen's Kappa - Therapy Other

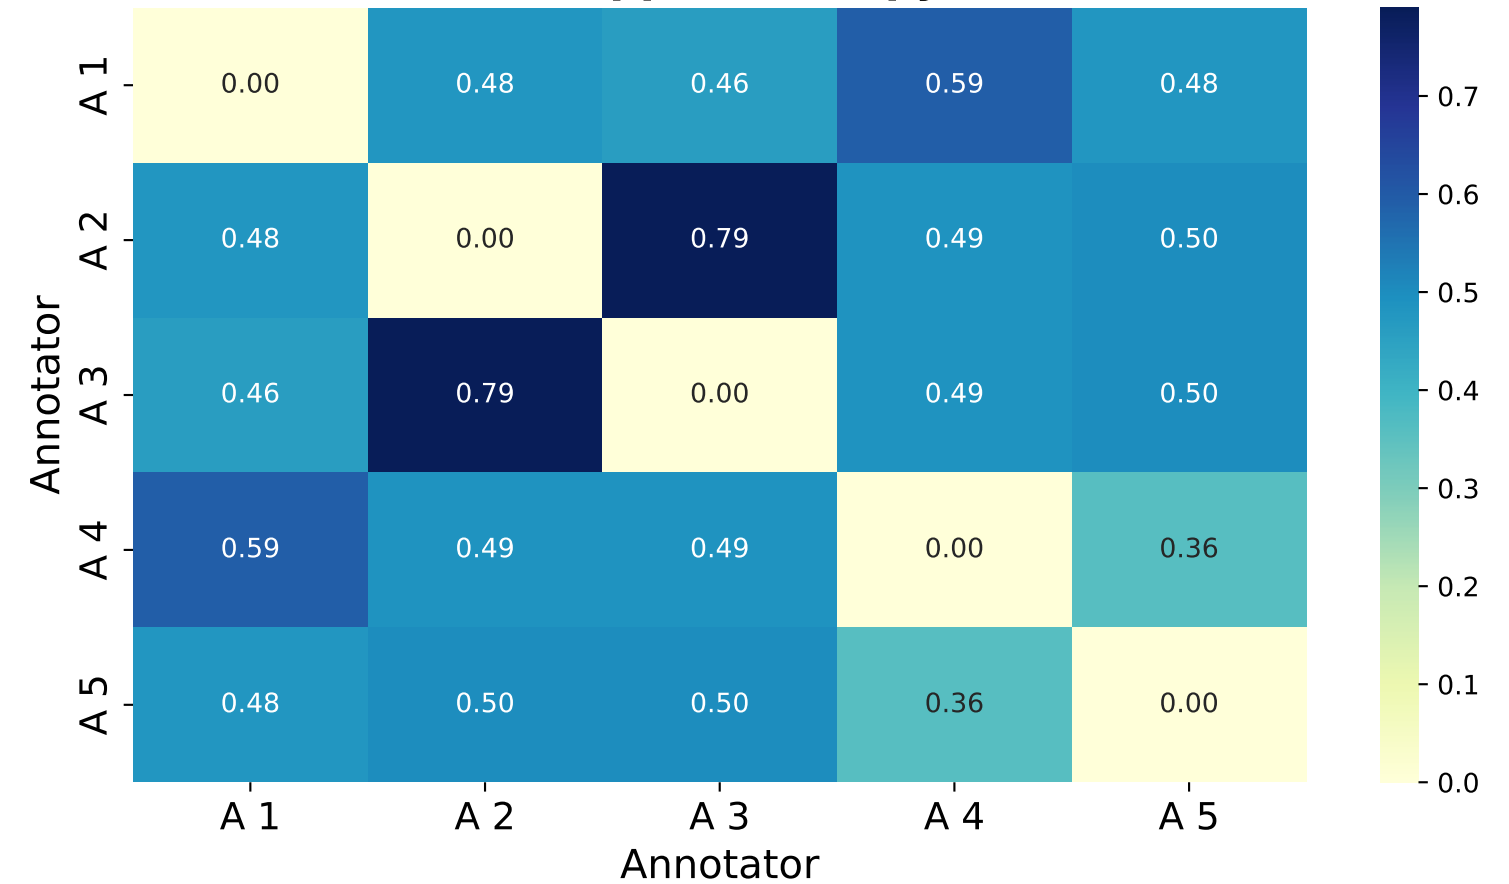

Top 15 Entities - Therapy Other

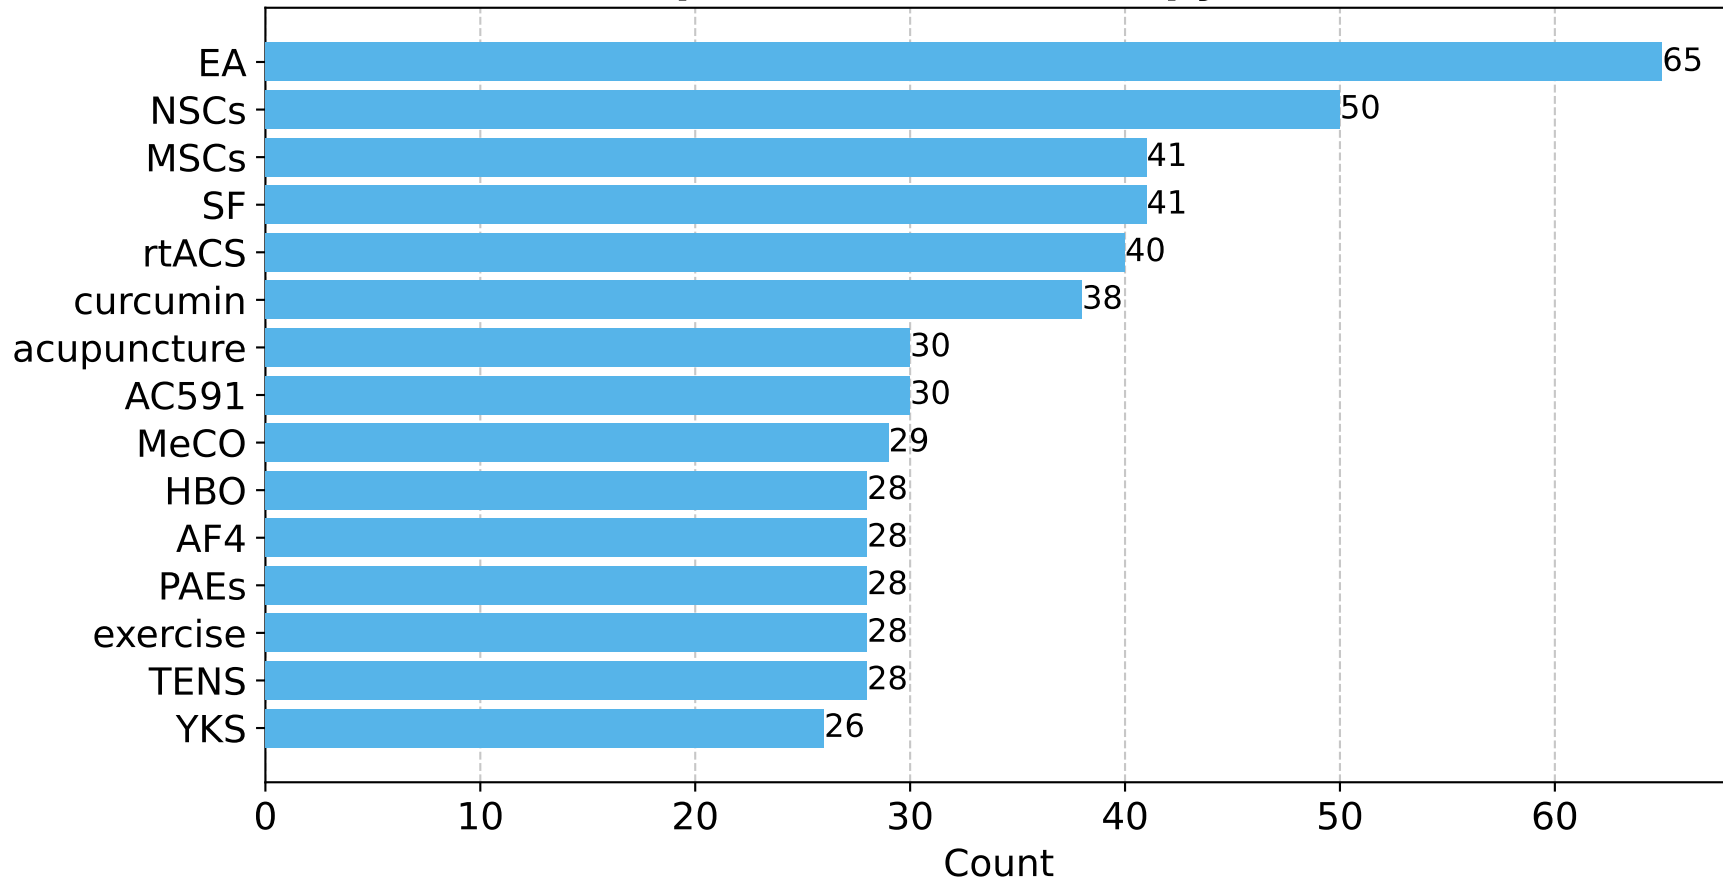

Cohen's Kappa - Disease

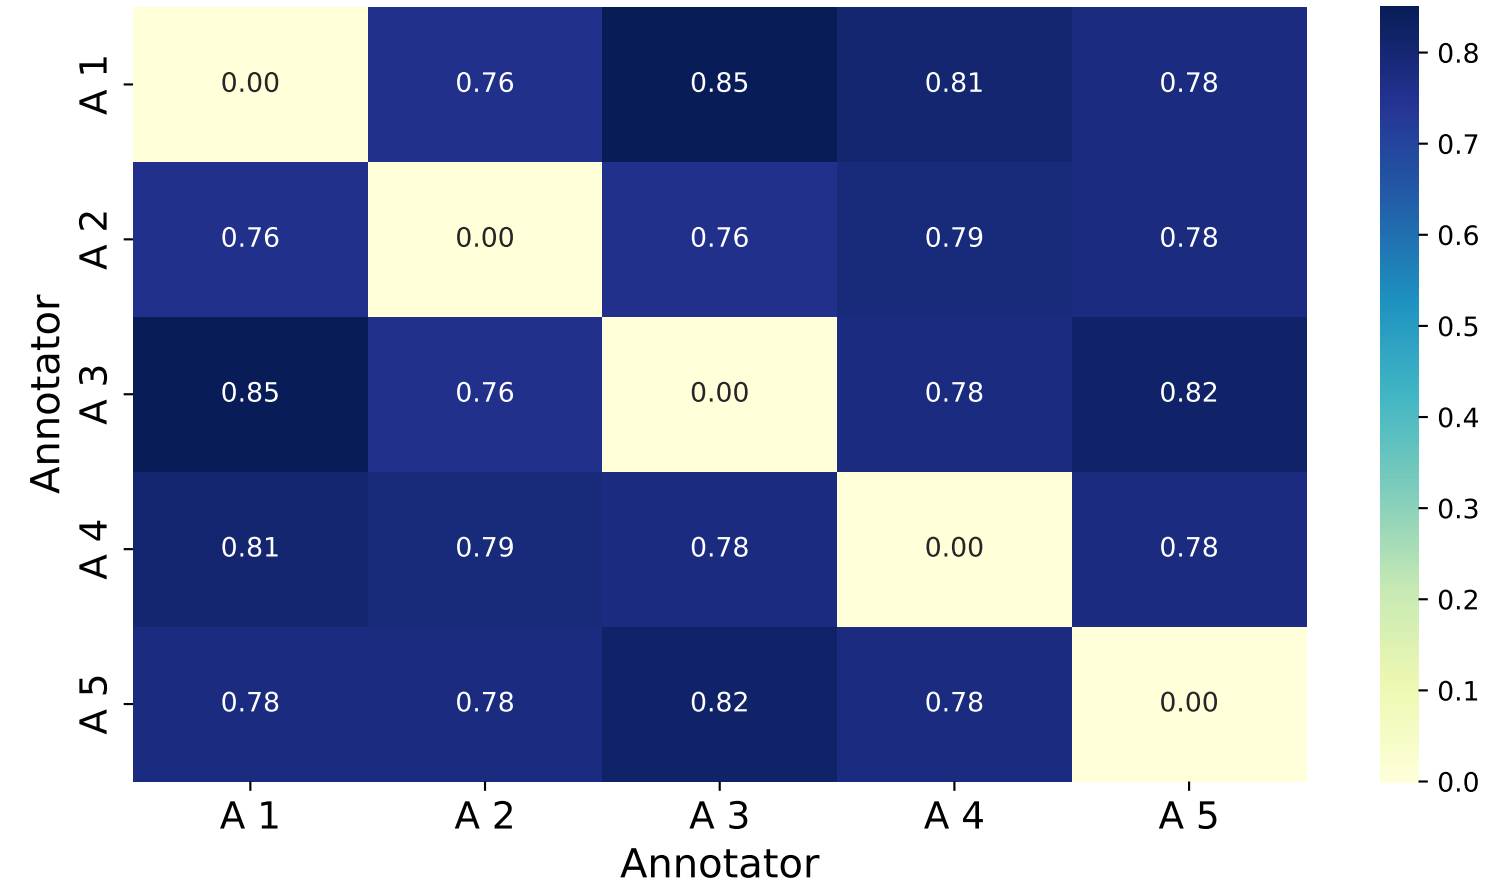

Top 15 Entities - Disease

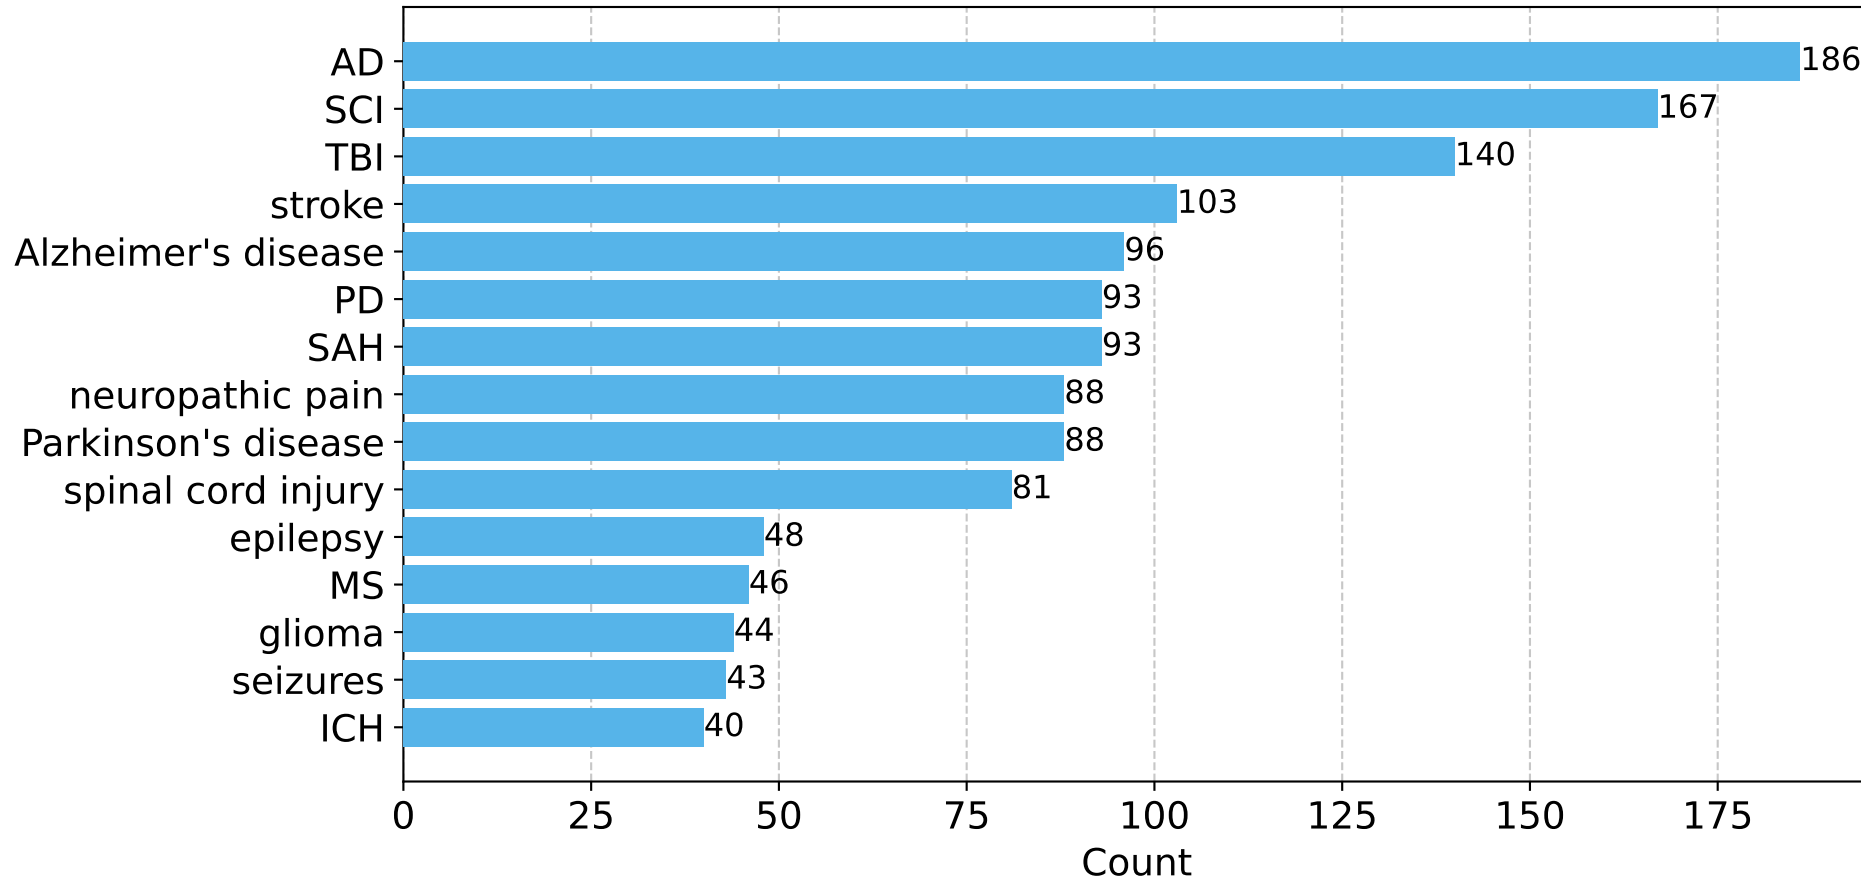

Cohen's Kappa - Strain

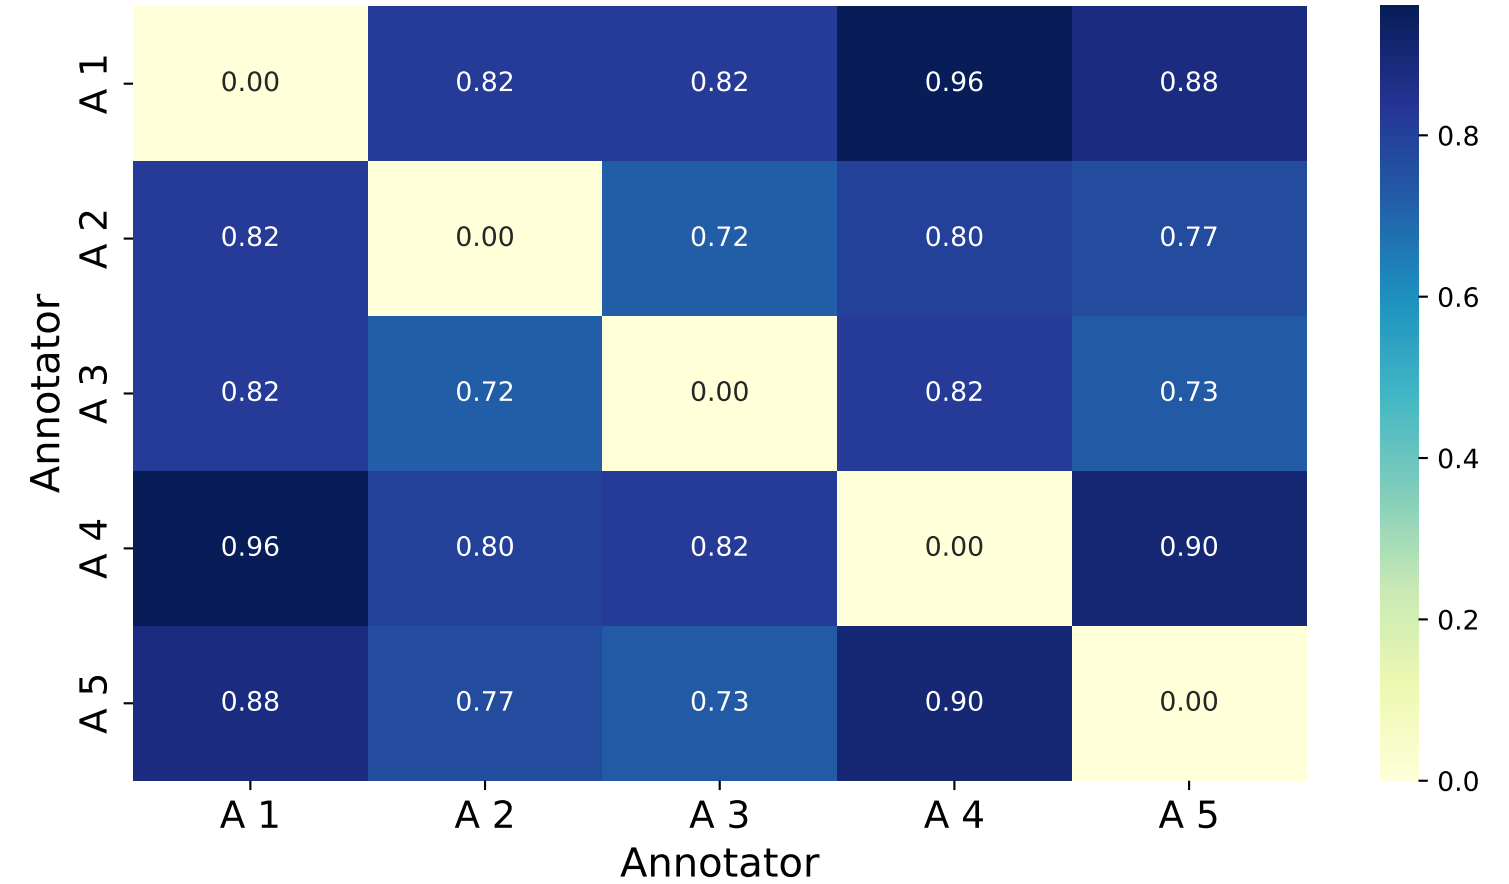

Top 15 Entities - Strain

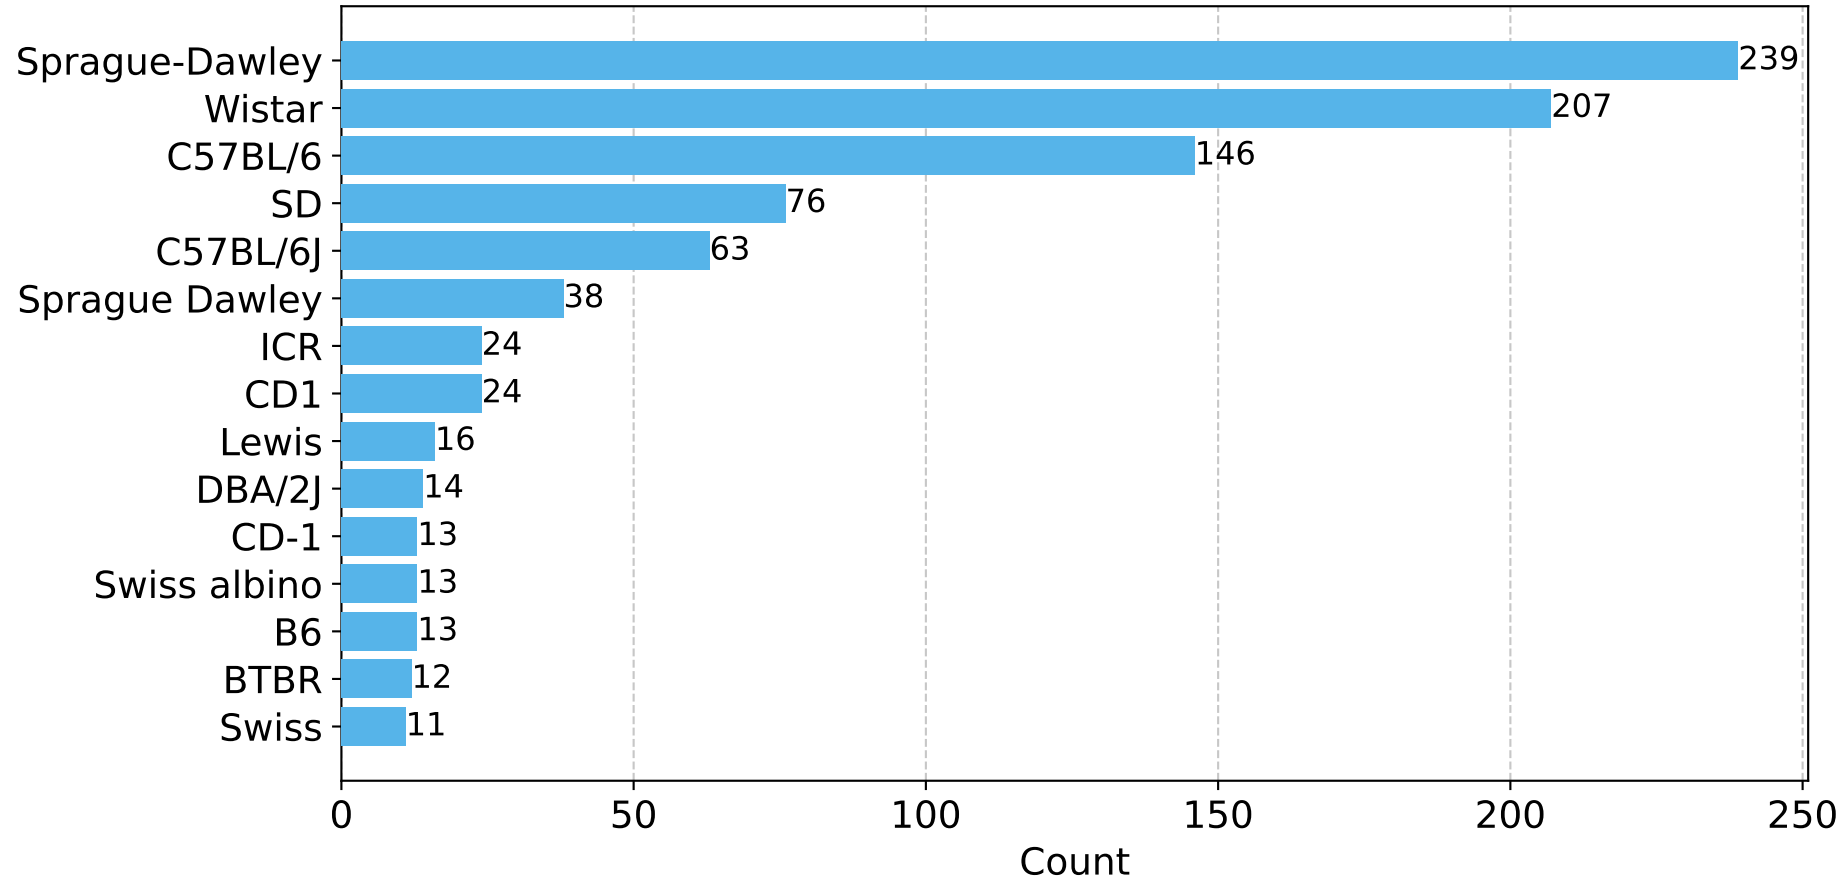

Cohen's Kappa - Animals Number

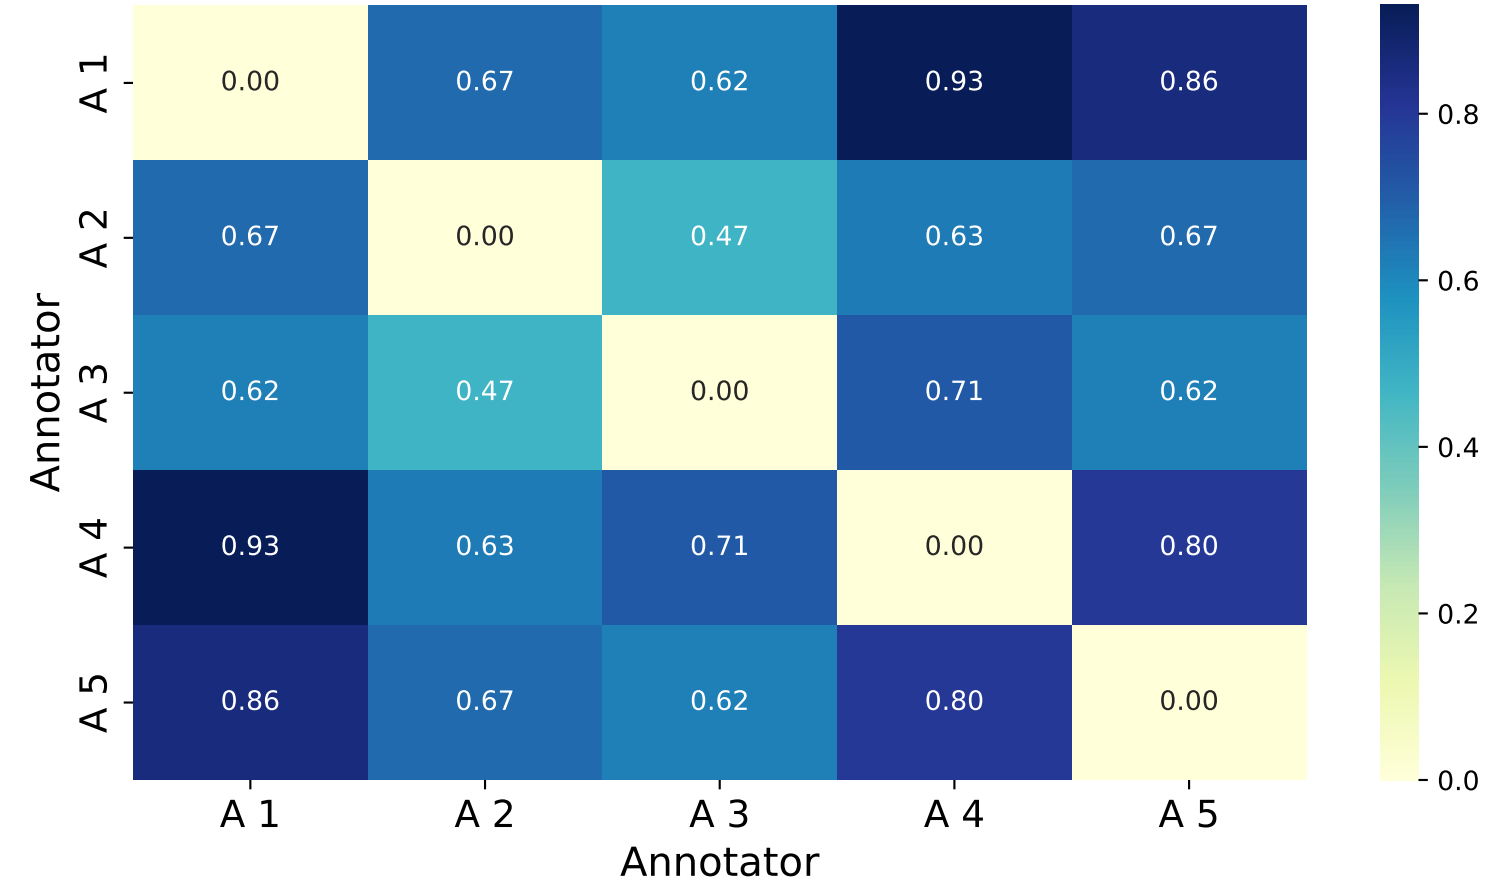

Top 15 Entities - Animals Number

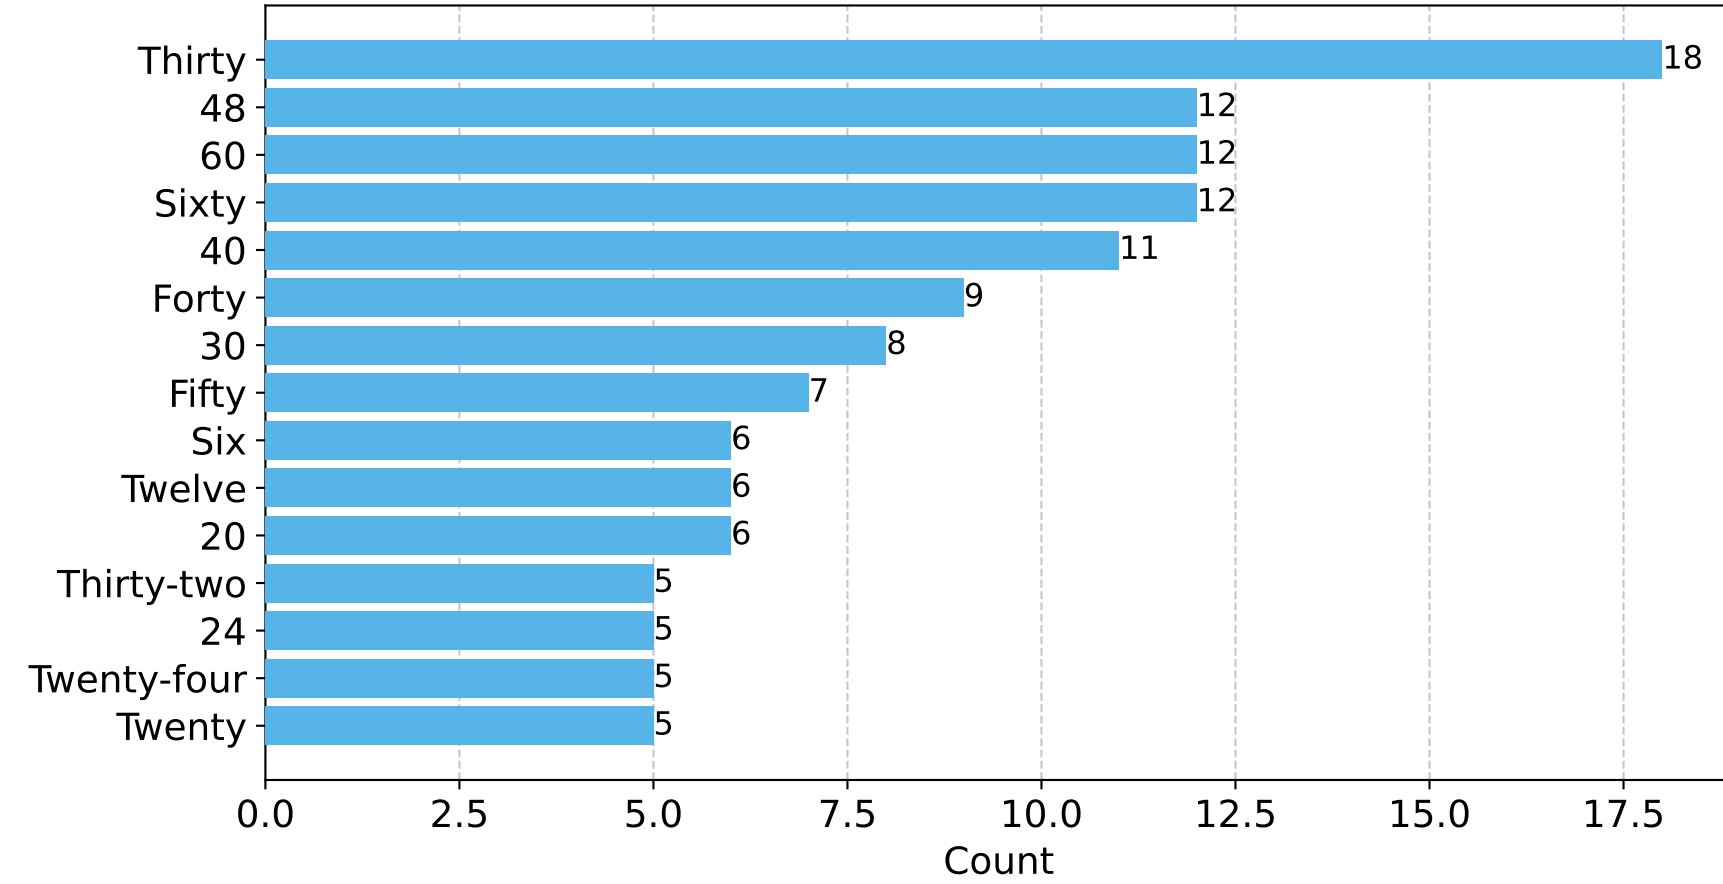

Supplement: SupplementaryMaterial [file ner_iaa_matrix_kappa.pdf › images/ner_iaa_matrix_kappa.pdf]
