# Supplementary material
Source: ML conference proceedings conference paper supplement (https://aclanthology.org/2025.bionlp-1.8)

IAA - Species

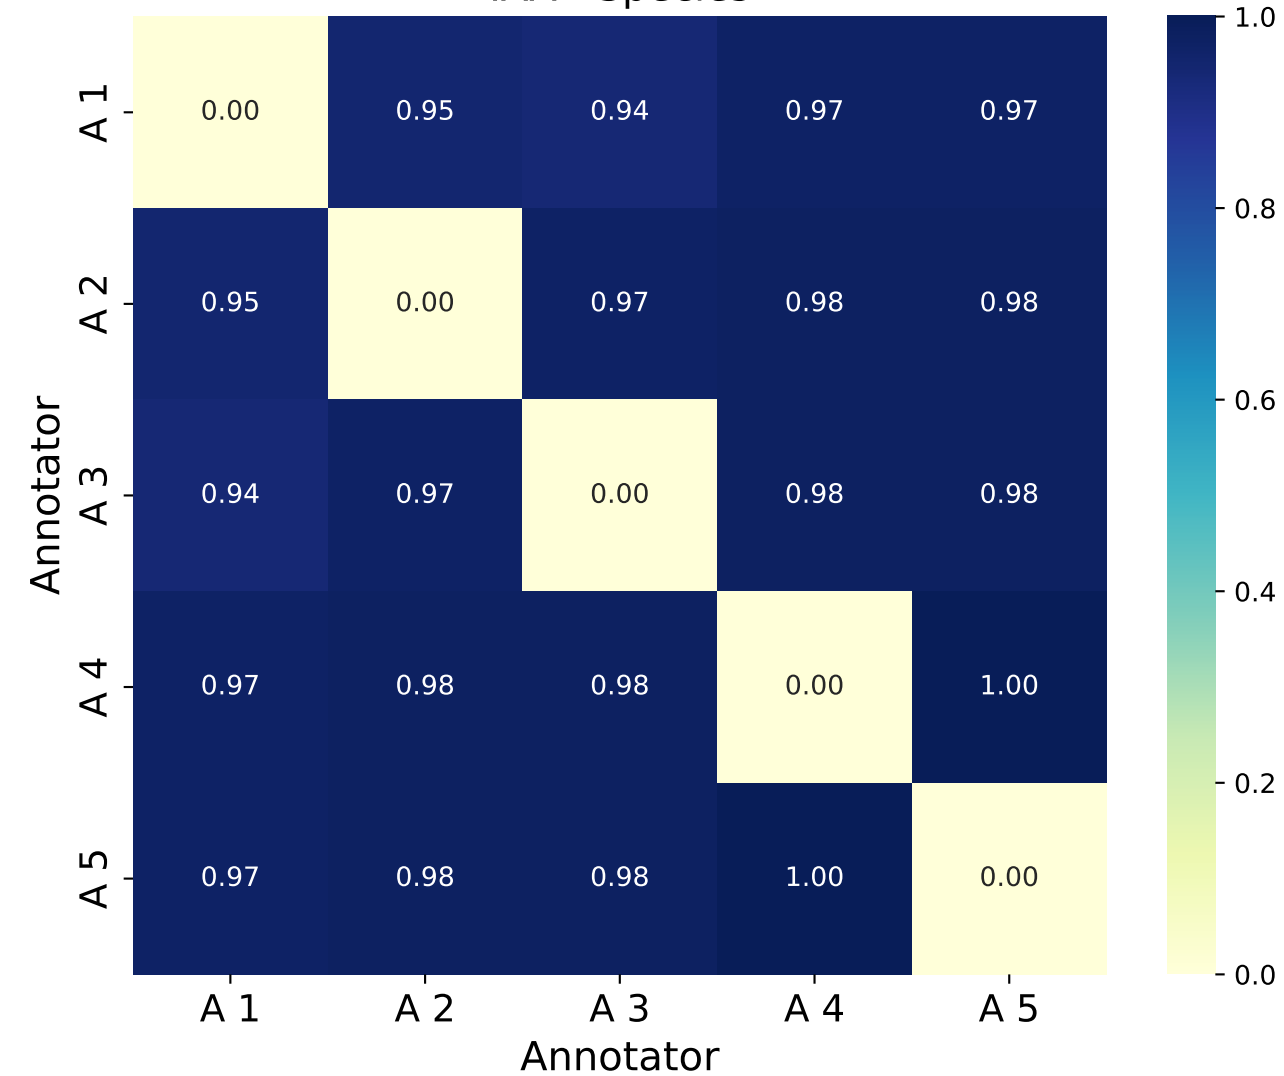

IAA - Control

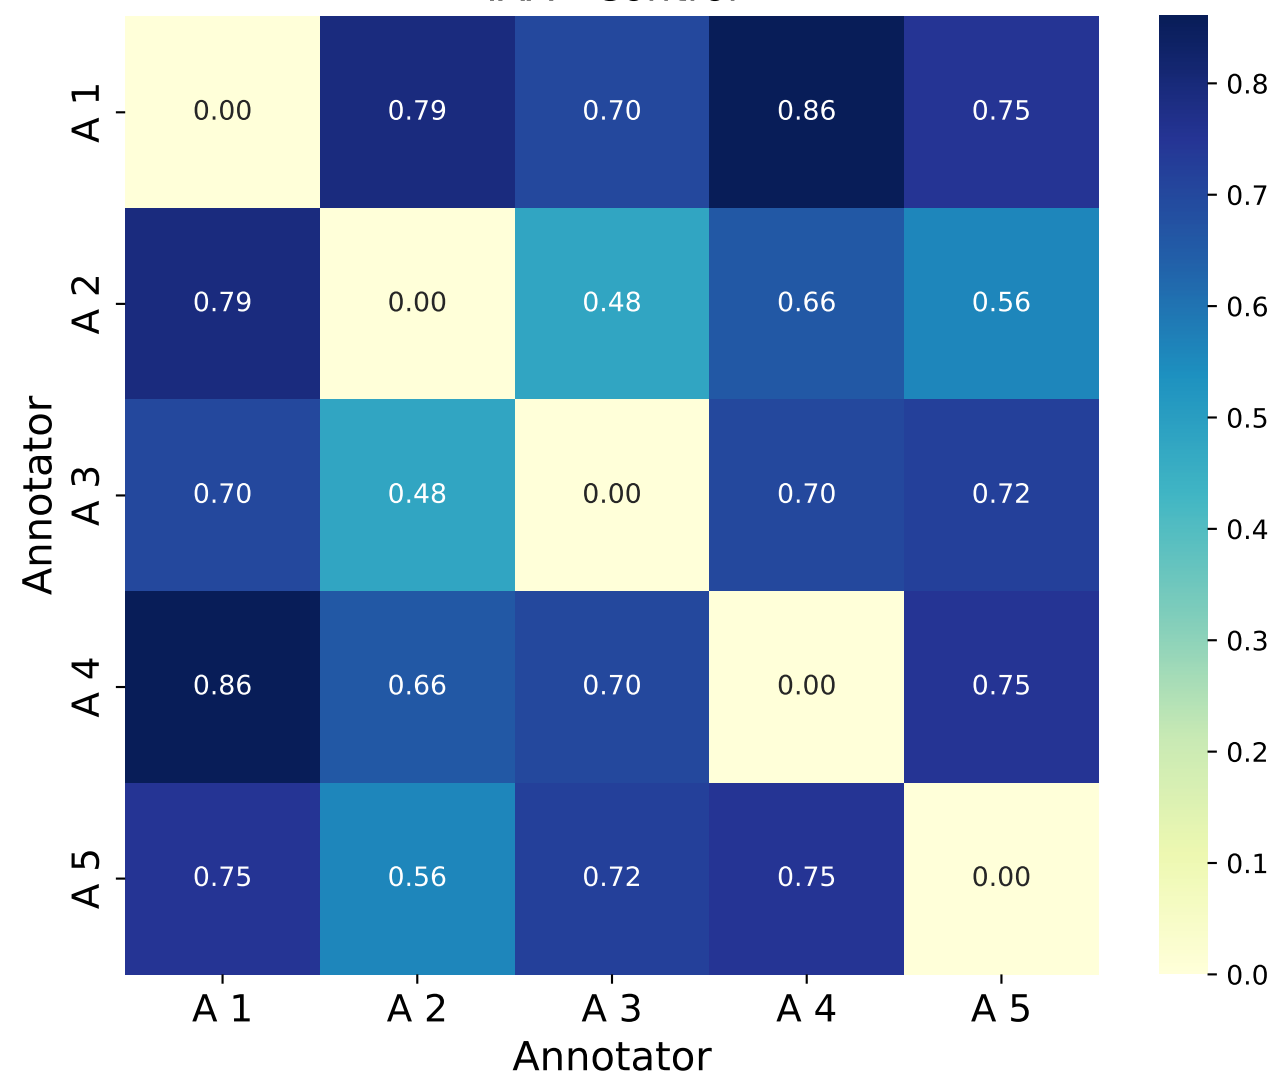

IAA - Outcome

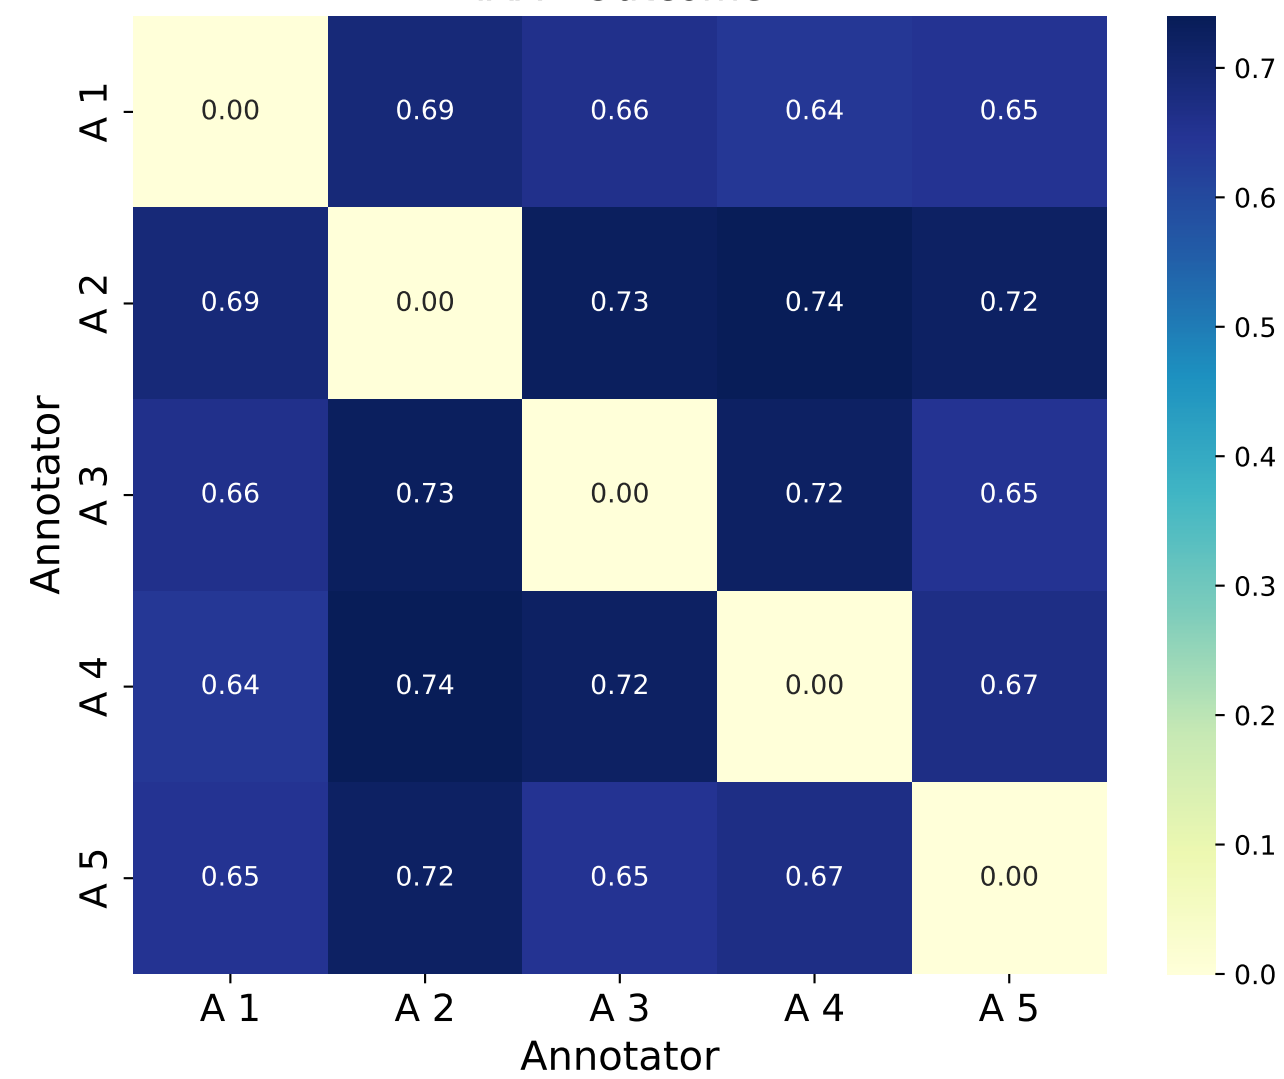

IAA - Sex

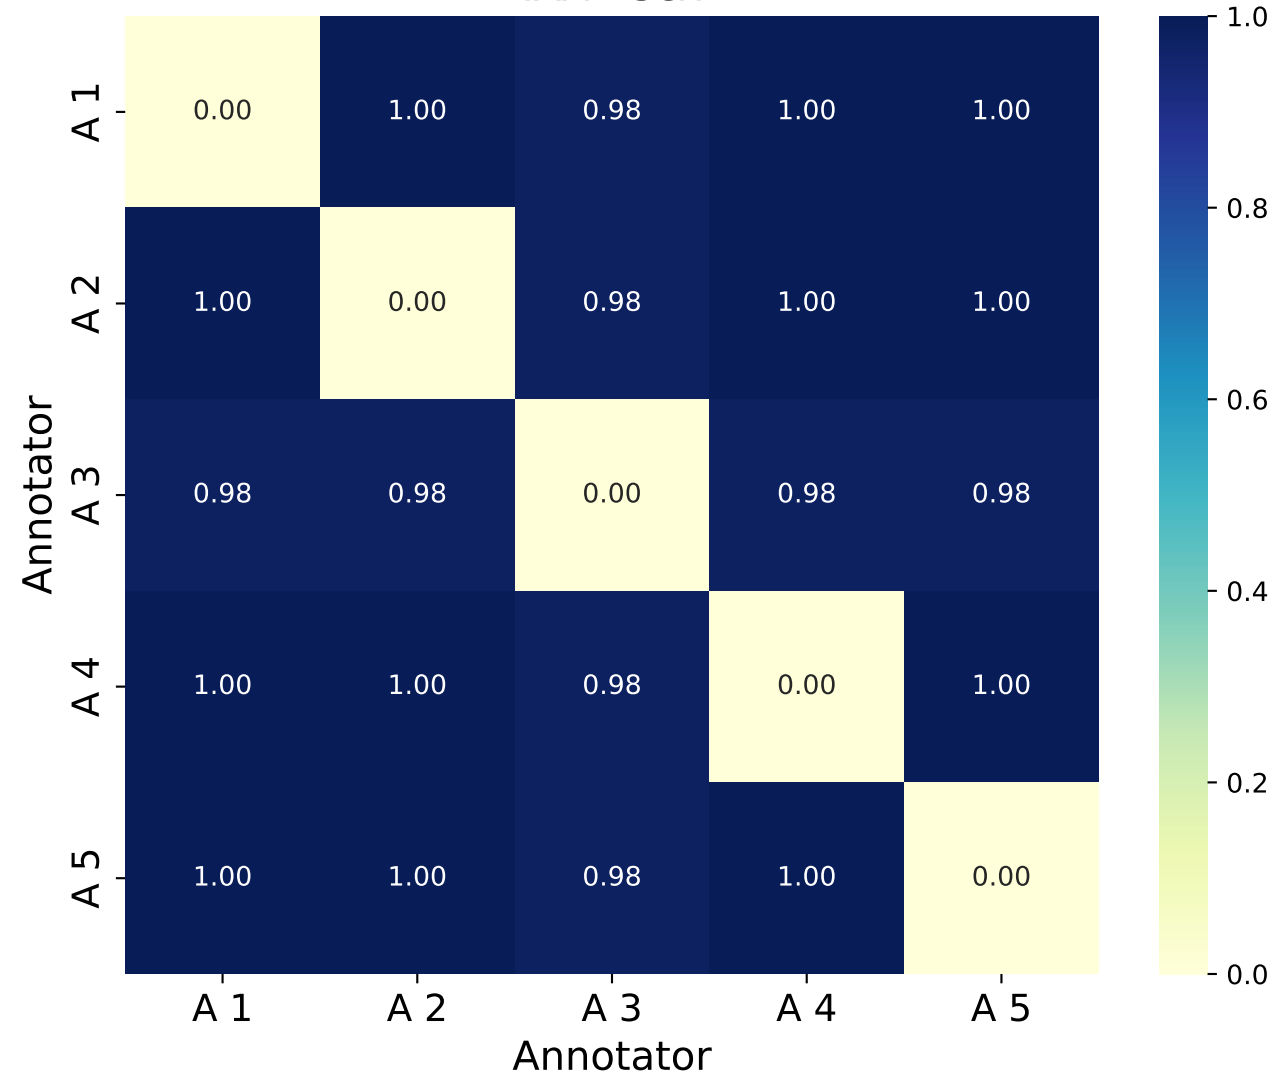

Supplement: SupplementaryMaterial [file all_categories_iaa_kappa.pdf › images/all_categories_iaa_kappa.pdf]

Articles per Year

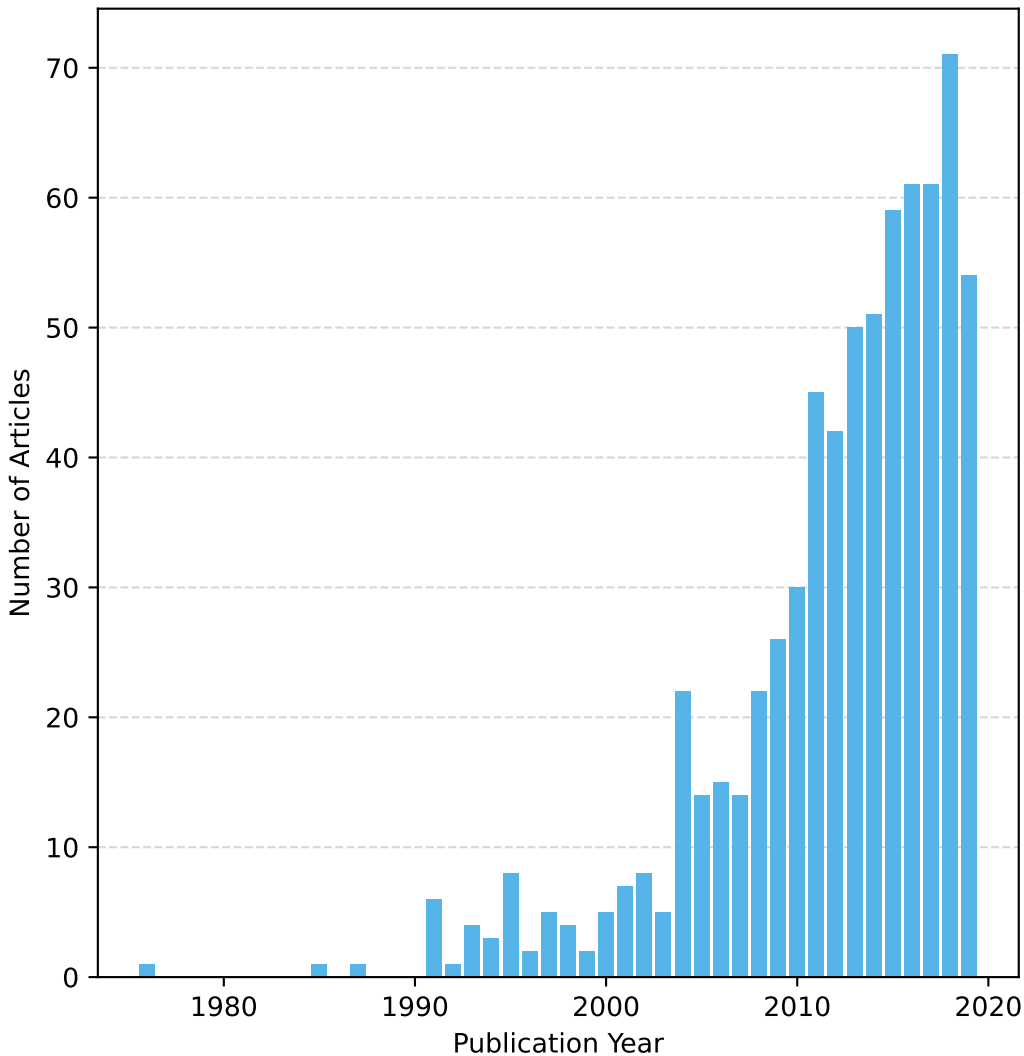

Top 20 Journals by Article Count

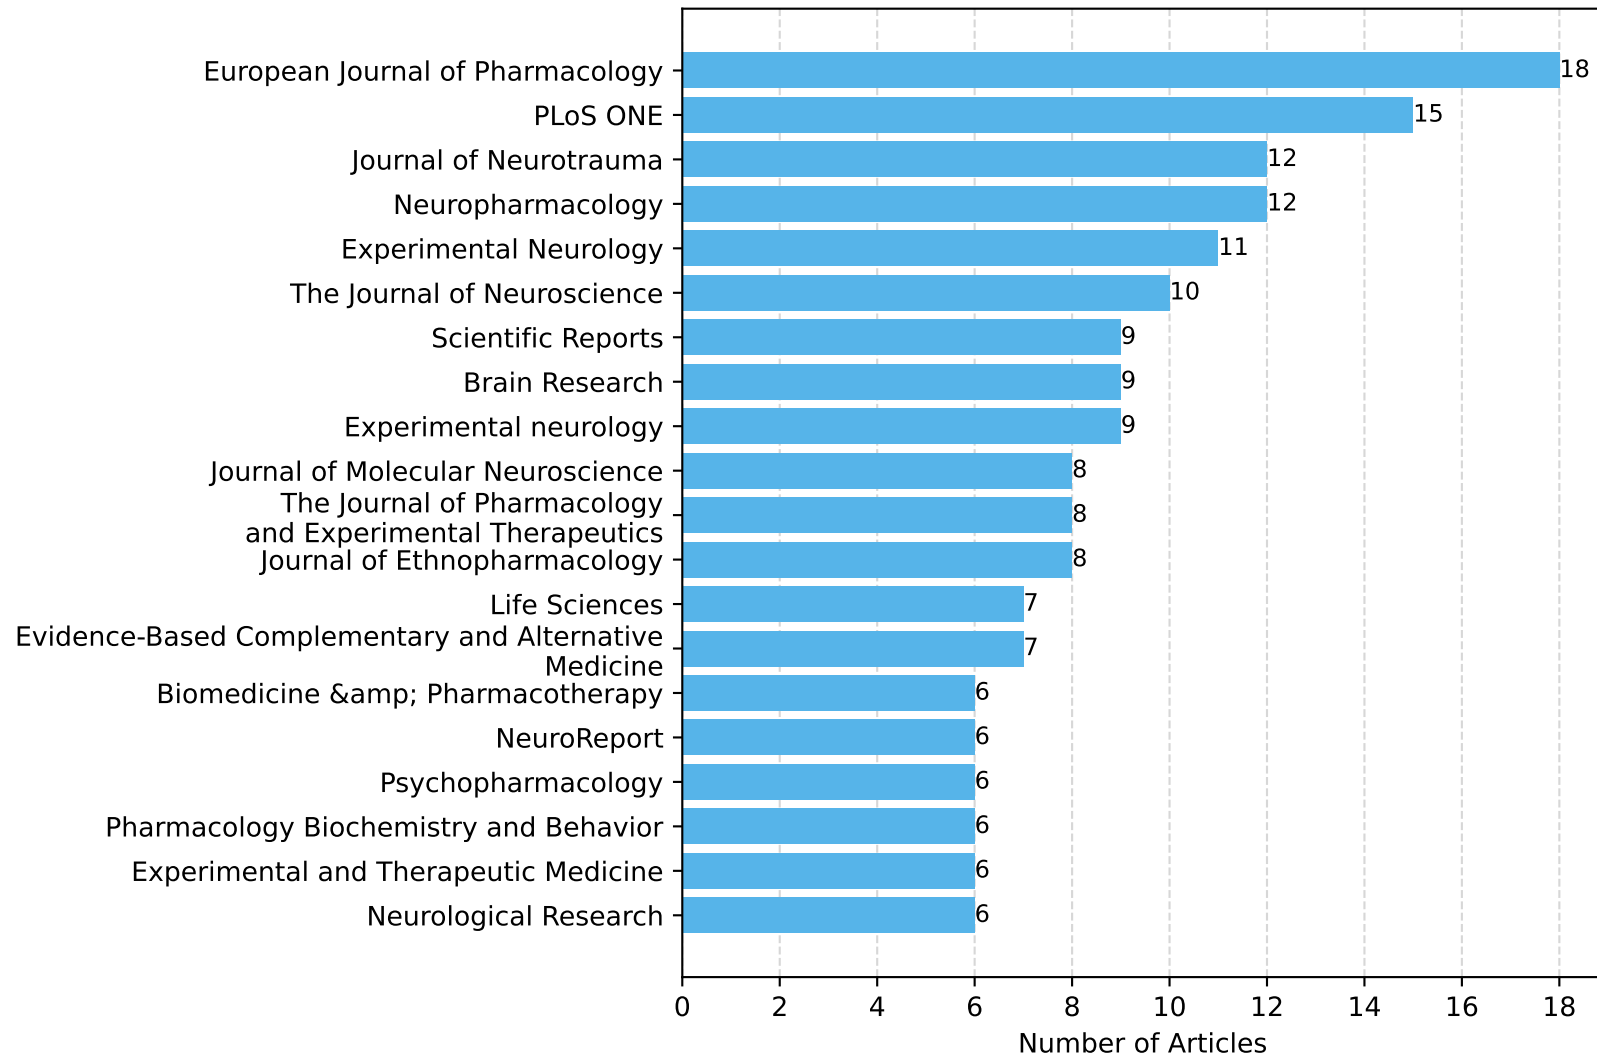

Supplement: SupplementaryMaterial [file corpus_metadata.pdf › images/corpus_metadata.pdf]
